# Supplementary material for: Metapangenomics reveals an increased proportion of an Escherichia coli-dominated enterotype in older Chinese people
Source: Research Square preprint supplement (doi:10.21203/rs.3.rs-1344848/v1), 2022-02-11
Supplement: Supplementary file 2 [file de74b1c9f0237ca1d85cb750.xls]

## Sheet: Sheet1
					Mean			SD
Pathway	Prevalence (%)	Module	p-value (Kruskal-Wallis rank sum test)	corrected p-value (BH FDR)	ET-P. copri	ET-Bacteroides spp.	ET-E. coli	ET-P. copri	ET-Bacteroides spp.	ET-E. coli
PWY_6124_inosine_5'_phosphate_biosynthesis_II	100	Module I	0.704	0.716	0.000197136	0.000209383	0.000223289	4.90811e-05	7.67361e-05	0.000112767
PWY_841_superpathway_of_purine_nucleotides_de_novo_biosynthesis_I	100	Module I	0.391	0.414	0.000200759	0.000197118	0.000201077	5.15484e-05	6.23244e-05	6.5942e-05
GLCMANNANAUT_PWY_superpathway_of_N_acetylglucosamine,_N_acetylmannosamine_and_N_acetylneuraminate_degradation	100	Module I	0.283	0.308	0.000165254	0.000174236	0.000177523	6.31828e-05	7.54471e-05	7.09288e-05
PWY_7391_isoprene_biosynthesis_II_(engineered)	6.53951	Module I	0.164	0.183	6.65385e-08	2.52038e-07	2.32375e-07	2.6978e-07	2.71107e-06	1.17111e-06
PWY_6174_mevalonate_pathway_II_(archaea)	6.53951	Module I	0.147	0.166	1.28538e-07	2.18917e-07	1.0125e-07	5.51408e-07	2.13771e-06	6.58518e-07
PWY_6123_inosine_5'_phosphate_biosynthesis_I	100	Module I	0.111	0.127	0.000224526	0.000242849	0.000252005	5.36488e-05	8.08496e-05	0.000140759
PWY_621_sucrose_degradation_III_(sucrose_invertase)	100	Module I	0.021	0.026	0.000128305	0.000160628	0.000154644	4.64334e-05	8.63224e-05	0.000118384
PWY_6167_flavin_biosynthesis_II_(archaea)	9.80926	Module I	0.012	0.016	8.46615e-07	8.44968e-07	6.2425e-07	2.82713e-06	4.98729e-06	3.07239e-06
PWY_7286_7_(3_amino_3_carboxypropyl)_wyosine_biosynthesis	10.8992	Module I	0.00897	0.012	4.69538e-07	4.45732e-07	3.71125e-07	1.55889e-06	2.55175e-06	1.81573e-06
METHANOGENESIS_PWY_methanogenesis_from_H2_and_CO2	10.8992	Module I	0.00361	0.00484	4.64231e-07	4.89809e-07	3.55625e-07	1.47671e-06	3.04374e-06	1.74072e-06
PWY_6165_chorismate_biosynthesis_II_(archaea)	9.80926	Module I	0.00341	0.0046	5.46769e-07	2.80573e-07	5.88e-07	1.69151e-06	2.00973e-06	2.79612e-06
PWY_5198_factor_420_biosynthesis	10.0817	Module I	0.0021	0.0029	4.06462e-07	3.66178e-07	2.9e-07	1.24708e-06	2.15833e-06	1.39879e-06
PWY_7197_pyrimidine_deoxyribonucleotide_phosphorylation	100	Module I	0.000157	0.000242	0.000136352	0.000153932	0.000133295	4.15529e-05	5.11987e-05	6.37957e-05
PWY_7187_pyrimidine_deoxyribonucleotides_de_novo_biosynthesis_II	100	Module I	3.59e-05	5.72e-05	0.000142523	0.000144128	0.000128941	3.47502e-05	4.49138e-05	6.15183e-05
PWY_5103_L_isoleucine_biosynthesis_III	100	Module I	1.07e-05	1.73e-05	0.000279825	0.000296968	0.000255417	6.56782e-05	0.000102596	0.000159236
PWY_7220_adenosine_deoxyribonucleotides_de_novo_biosynthesis_II	100	Module I	5.54e-07	9.34e-07	0.000147189	0.000190201	0.000171765	3.97187e-05	7.53853e-05	7.66393e-05
PWY_7222_guanosine_deoxyribonucleotides_de_novo_biosynthesis_II	100	Module I	5.54e-07	9.3e-07	0.000147189	0.000190201	0.000171765	3.97187e-05	7.53853e-05	7.66393e-05
PWY_7184_pyrimidine_deoxyribonucleotides_de_novo_biosynthesis_I	100	Module I	5.46e-07	9.24e-07	0.000165564	0.000195473	0.000169862	3.82148e-05	5.50229e-05	6.17658e-05
PWY_6527_stachyose_degradation	100	Module I	2.83e-07	4.88e-07	0.000188773	0.000225565	0.000178647	5.6587e-05	8.08046e-05	7.20599e-05
PWY66_422_D_galactose_degradation_V_(Leloir_pathway)	100	Module I	7.4e-08	1.32e-07	0.000220315	0.000252342	0.000195831	6.30396e-05	8.53964e-05	8.38809e-05
BRANCHED_CHAIN_AA_SYN_PWY_superpathway_of_branched_amino_acid_biosynthesis	100	Module I	5.26e-08	9.44e-08	0.000318757	0.000333859	0.000274742	6.95147e-05	0.00010429	0.000157654
PWY_6317_galactose_degradation_I_(Leloir_pathway)	100	Module I	4.92e-08	8.87e-08	0.000219041	0.000251364	0.000193288	6.36237e-05	8.67681e-05	8.49381e-05
DENOVOPURINE2_PWY_superpathway_of_purine_nucleotides_de_novo_biosynthesis_II	100	Module I	4.6e-08	8.33e-08	0.000167943	0.000157818	0.000139654	4.61922e-05	4.56642e-05	6.6167e-05
PWY_6125_superpathway_of_guanosine_nucleotides_de_novo_biosynthesis_II	100	Module I	1.87e-08	3.41e-08	0.000217594	0.000262738	0.000207539	5.47869e-05	9.0025e-05	8.18667e-05
PWY_3001_superpathway_of_L_isoleucine_biosynthesis_I	100	Module I	4.6e-09	8.47e-09	0.000247217	0.000287882	0.000243561	4.36832e-05	7.37317e-05	8.23773e-05
PWY_6126_superpathway_of_adenosine_nucleotides_de_novo_biosynthesis_II	100	Module I	3.34e-09	6.21e-09	0.000278591	0.000329821	0.000265535	6.14581e-05	9.77367e-05	9.33709e-05
PWY_7228_superpathway_of_guanosine_nucleotides_de_novo_biosynthesis_I	100	Module I	2.95e-09	5.5e-09	0.000255823	0.000296537	0.000225524	7.46939e-05	9.99585e-05	8.58574e-05
PWY_7357_thiamin_formation_from_pyrithiamine_and_oxythiamine_(yeast)	100	Module I	2.18e-09	4.09e-09	0.000311223	0.000298217	0.000225837	0.000131865	0.000105435	8.78719e-05
THISYNARA_PWY_superpathway_of_thiamin_diphosphate_biosynthesis_III_(eukaryotes)	100	Module I	3.89e-10	7.55e-10	0.000128615	0.000179417	0.000158137	4.6735e-05	7.61486e-05	5.66541e-05
PWY0_1296_purine_ribonucleosides_degradation	100	Module I	2.07e-10	4.04e-10	0.000318023	0.000359325	0.000274756	7.1447e-05	0.000107966	9.00624e-05
DTDPRHAMSYN_PWY_dTDP_L_rhamnose_biosynthesis_I	100	Module I	8.53e-11	1.67e-10	0.000263619	0.000286905	0.000194856	7.40681e-05	0.000101445	0.000123579
PWY_6122_5_aminoimidazole_ribonucleotide_biosynthesis_II	100	Module I	8.24e-11	1.63e-10	0.000411599	0.000448785	0.000344962	9.11778e-05	0.000127735	0.000175503
PWY_6277_superpathway_of_5_aminoimidazole_ribonucleotide_biosynthesis	100	Module I	8.24e-11	1.62e-10	0.000411599	0.000448785	0.000344962	9.11778e-05	0.000127735	0.000175503
PWY0_166_superpathway_of_pyrimidine_deoxyribonucleotides_de_novo_biosynthesis_(E._coli)	100	Module I	3.97e-11	8e-11	0.000192911	0.00022871	0.000190833	4.20662e-05	5.56497e-05	6.53551e-05
PWY_7208_superpathway_of_pyrimidine_nucleobases_salvage	100	Module I	2.12e-11	4.34e-11	0.000221041	0.000268423	0.000197311	7.34114e-05	9.16491e-05	8.43596e-05
PWY_7229_superpathway_of_adenosine_nucleotides_de_novo_biosynthesis_I	100	Module I	1.99e-11	4.09e-11	0.000346744	0.000392741	0.0003133	6.74125e-05	9.86482e-05	9.76466e-05
PWY_6609_adenine_and_adenosine_salvage_III	100	Module I	1.94e-11	4.02e-11	0.000187935	0.000247256	0.000228575	5.47941e-05	7.58203e-05	9.20225e-05
PWY_6121_5_aminoimidazole_ribonucleotide_biosynthesis_I	100	Module I	8.36e-14	1.86e-13	0.000389637	0.00046219	0.000346784	9.21138e-05	0.000116105	0.000160081
NONOXIPENT_PWY_pentose_phosphate_pathway_(non_oxidative_branch)	100	Module I	7.97e-15	1.84e-14	0.000278611	0.000326827	0.000210787	6.38131e-05	9.32996e-05	0.000114121
1CMET2_PWY_N10_formyl_tetrahydrofolate_biosynthesis	100	Module I	1e-15	1e-15	0.000218302	0.000390773	0.000250744	6.55476e-05	0.000102147	9.1465e-05
ANAGLYCOLYSIS_PWY_glycolysis_III_(from_glucose)	100	Module I	1e-15	1e-15	0.000280662	0.000380294	0.000299396	5.77233e-05	7.98768e-05	8.13224e-05
ARO_PWY_chorismate_biosynthesis_I	100	Module I	1e-15	1e-15	0.000508731	0.00049786	0.000364164	8.38729e-05	0.000113367	0.000110387
ASPASN_PWY_superpathway_of_L_aspartate_and_L_asparagine_biosynthesis	100	Module I	1e-15	1e-15	0.000159514	0.000204451	0.000229941	3.98177e-05	6.21417e-05	7.74159e-05
CALVIN_PWY_Calvin_Benson_Bassham_cycle	100	Module I	1e-15	1e-15	0.000327048	0.000399204	0.000274206	6.55323e-05	8.93804e-05	9.62805e-05
COA_PWY_1_coenzyme_A_biosynthesis_II_(mammalian)	100	Module I	1e-15	1e-15	0.000506173	0.000589705	0.000414523	0.000102852	9.5484e-05	0.000154451
COMPLETE_ARO_PWY_superpathway_of_aromatic_amino_acid_biosynthesis	100	Module I	1e-15	1e-15	0.000509531	0.000487286	0.000356677	8.91374e-05	0.000102663	0.000105286
ILEUSYN_PWY_L_isoleucine_biosynthesis_I_(from_threonine)	100	Module I	1e-15	1e-15	0.000477567	0.000602111	0.000403248	8.5408e-05	0.000119534	0.000182934
NONMEVIPP_PWY_methylerythritol_phosphate_pathway_I	100	Module I	1e-15	1e-15	0.000668108	0.000575927	0.000329661	0.000148704	0.000106994	0.000111455
PANTO_PWY_phosphopantothenate_biosynthesis_I	100	Module I	1e-15	1e-15	0.000450971	0.000504971	0.000300865	9.25094e-05	0.000121577	9.29719e-05
PEPTIDOGLYCANSYN_PWY_peptidoglycan_biosynthesis_I_(meso_diaminopimelate_containing)	100	Module I	1e-15	1e-15	0.000678517	0.000634092	0.000405421	0.000121072	0.000109444	0.000117192
PWY_1042_glycolysis_IV_(plant_cytosol)	100	Module I	1e-15	1e-15	0.000400149	0.000493296	0.000355152	0.000113711	0.000125438	0.000116337
PWY_2942_L_lysine_biosynthesis_III	100	Module I	1e-15	1e-15	0.000675716	0.000560879	0.000327774	0.000190893	0.000110475	0.000116511
PWY_3841_folate_transformations_II	100	Module I	1e-15	1e-15	0.000228618	0.000400491	0.000257545	7.35765e-05	9.63223e-05	9.94507e-05
PWY_5097_L_lysine_biosynthesis_VI	100	Module I	1e-15	1e-15	0.000712502	0.000591058	0.000342556	0.000190631	0.000111467	0.000119507
PWY_5667_CDP_diacylglycerol_biosynthesis_I	100	Module I	1e-15	1e-15	0.000525562	0.000577787	0.000370525	0.000130492	0.000116093	0.0001031
PWY_5686_UMP_biosynthesis	100	Module I	1e-15	1e-15	0.000755951	0.000664145	0.000413438	0.000178482	0.000122268	0.000135111
PWY_5695_urate_biosynthesis/inosine_5'_phosphate_degradation	100	Module I	1e-15	1e-15	0.000413016	0.000504981	0.000362696	6.82598e-05	0.000119493	7.02218e-05
PWY_5973_cis_vaccenate_biosynthesis	100	Module I	1e-15	1e-15	0.000343994	0.000343774	0.000209453	7.52918e-05	7.85025e-05	7.38044e-05
PWY_6151_S_adenosyl_L_methionine_cycle_I	100	Module I	1e-15	1e-15	0.000717527	0.000556786	0.000373007	0.000216747	0.000119463	0.000165872
PWY_6163_chorismate_biosynthesis_from_3_dehydroquinate	100	Module I	1e-15	1e-15	0.000531508	0.000510738	0.000360517	0.000105632	0.000118573	0.000114299
PWY_6168_flavin_biosynthesis_III_(fungi)	100	Module I	1e-15	1e-15	0.000158202	0.000227561	0.000192005	5.0098e-05	6.52263e-05	6.39128e-05
PWY_6385_peptidoglycan_biosynthesis_III_(mycobacteria)	100	Module I	1e-15	1e-15	0.000334933	0.000412215	0.000295748	8.30501e-05	9.5006e-05	8.64698e-05
PWY_6386_UDP_N_acetylmuramoyl_pentapeptide_biosynthesis_II_(lysine_containing)	100	Module I	1e-15	1e-15	0.000679354	0.000650768	0.000411053	0.000120679	0.00011386	0.000125757
PWY_6387_UDP_N_acetylmuramoyl_pentapeptide_biosynthesis_I_(meso_diaminopimelate_containing)	100	Module I	1e-15	1e-15	0.00065884	0.000635219	0.000403675	0.000114204	0.000113412	0.000118351
PWY_6545_pyrimidine_deoxyribonucleotides_de_novo_biosynthesis_III	100	Module I	1e-15	1e-15	0.000166563	0.000150371	9.9755e-05	3.77141e-05	4.40317e-05	4.73535e-05
PWY_6700_queuosine_biosynthesis	100	Module I	1e-15	1e-15	0.000735299	0.00056327	0.000315621	0.000204565	0.000151381	0.000113225
PWY_6703_preQ0_biosynthesis	100	Module I	1e-15	1e-15	0.000306374	0.000428723	0.000242546	9.15839e-05	0.000140218	9.98672e-05
PWY_6737_starch_degradation_V	100	Module I	1e-15	1e-15	0.000527267	0.000577509	0.000317566	0.00013639	0.00018578	0.000165029
PWY_6897_thiamin_salvage_II	100	Module I	1e-15	1e-15	0.000314296	0.000288816	0.000180469	0.000116289	9.38862e-05	5.63206e-05
PWY_7111_pyruvate_fermentation_to_isobutanol_(engineered)	100	Module I	1e-15	1e-15	0.000477567	0.000601502	0.000428219	8.5408e-05	0.000120868	0.000169737
PWY_7219_adenosine_ribonucleotides_de_novo_biosynthesis	100	Module I	1e-15	1e-15	0.000954037	0.000862619	0.000563806	0.000213396	0.000140302	0.000210181
PWY_7221_guanosine_ribonucleotides_de_novo_biosynthesis	100	Module I	1e-15	1e-15	0.000745566	0.000630003	0.000419345	0.000182165	0.000106688	0.000158624
PWY_724_superpathway_of_L_lysine,_L_threonine_and_L_methionine_biosynthesis_II	100	Module I	1e-15	1e-15	0.000356528	0.000381856	0.000259216	6.44338e-05	8.022e-05	8.82587e-05
PWY_7663_gondoate_biosynthesis_(anaerobic)	100	Module I	1e-15	1e-15	0.000306016	0.000325795	0.000230384	6.83008e-05	8.63843e-05	9.13967e-05
PWY0_1319_CDP_diacylglycerol_biosynthesis_II	100	Module I	1e-15	1e-15	0.000525603	0.000578251	0.000370711	0.000130463	0.000115076	0.00010324
PYRIDOXSYN_PWY_pyridoxal_5'_phosphate_biosynthesis_I	100	Module I	1e-15	1e-15	6.11174e-05	0.000190255	0.000131915	3.4563e-05	0.00010765	8.06984e-05
TRNA_CHARGING_PWY_tRNA_charging	100	Module I	1e-15	1e-15	0.000345346	0.00032124	0.000192663	0.000110934	0.00010654	9.65543e-05
UDPNAGSYN_PWY_UDP_N_acetyl_D_glucosamine_biosynthesis_I	100	Module I	1e-15	1e-15	6.71821e-05	8.71492e-05	0.000194042	4.4708e-05	9.02832e-05	0.000148231
VALSYN_PWY_L_valine_biosynthesis	100	Module I	1e-15	1e-15	0.000477567	0.000602111	0.000403248	8.5408e-05	0.000119534	0.000182934
ARGDEG_PWY_superpathway_of_L_arginine,_putrescine,_and_4_aminobutanoate_degradation	83.3787	Module II	1e-15	1e-15	6.87315e-06	4.67701e-06	4.97028e-05	1.14717e-05	6.94738e-06	3.57259e-05
AST_PWY_L_arginine_degradation_II_(AST_pathway)	93.4605	Module II	1e-15	1e-15	7.64969e-06	5.47191e-06	5.09418e-05	1.02337e-05	8.32758e-06	3.37484e-05
BIOTIN_BIOSYNTHESIS_PWY_biotin_biosynthesis_I	99.7275	Module II	1e-15	1e-15	5.0127e-05	4.91839e-05	0.000112677	2.94687e-05	4.1468e-05	4.56376e-05
ECASYN_PWY_enterobacterial_common_antigen_biosynthesis	88.5559	Module II	1e-15	1e-15	7.33538e-06	5.11943e-06	6.12264e-05	1.14423e-05	7.16263e-06	4.09189e-05
ENTBACSYN_PWY_enterobactin_biosynthesis	89.9183	Module II	1e-15	1e-15	2.54437e-05	2.13189e-05	0.000150585	2.98276e-05	2.13636e-05	8.48822e-05
FASYN_ELONG_PWY_fatty_acid_elongation____saturated	99.7275	Module II	1e-15	1e-15	6.32005e-05	5.31464e-05	0.000123329	4.79064e-05	5.71414e-05	5.28697e-05
FASYN_INITIAL_PWY_superpathway_of_fatty_acid_biosynthesis_initiation_(E._coli)	99.7275	Module II	1e-15	1e-15	4.69285e-05	4.00009e-05	0.000113018	4.24309e-05	5.29245e-05	7.08173e-05
FUC_RHAMCAT_PWY_superpathway_of_fucose_and_rhamnose_degradation	98.0926	Module II	1e-15	1e-15	2.77415e-05	2.40438e-05	0.000104406	2.42374e-05	2.08893e-05	4.89781e-05
FUCCAT_PWY_fucose_degradation	99.455	Module II	1e-15	1e-15	2.34628e-05	2.08924e-05	9.83249e-05	2.20562e-05	1.91515e-05	5.77503e-05
GALACTARDEG_PWY_D_galactarate_degradation_I	96.1853	Module II	1e-15	1e-15	1.32492e-05	9.69624e-06	5.9484e-05	1.44542e-05	1.30173e-05	3.90563e-05
GLUCARDEG_PWY_D_glucarate_degradation_I	96.1853	Module II	1e-15	1e-15	1.44283e-05	9.2958e-06	6.67154e-05	1.61277e-05	1.25588e-05	4.39631e-05
GLUCARGALACTSUPER_PWY_superpathway_of_D_glucarate_and_D_galactarate_degradation	96.1853	Module II	1e-15	1e-15	1.32492e-05	9.69624e-06	5.9484e-05	1.44542e-05	1.30173e-05	3.90563e-05
GLUCOSE1PMETAB_PWY_glucose_and_glucose_1_phosphate_degradation	98.0926	Module II	1e-15	1e-15	2.22911e-05	2.06201e-05	0.000110737	2.51584e-05	2.2296e-05	5.17602e-05
GLYCOL_GLYOXDEG_PWY_superpathway_of_glycol_metabolism_and_degradation	92.3706	Module II	1e-15	1e-15	6.12362e-06	4.57713e-06	5.03021e-05	1.01223e-05	6.97359e-06	3.76891e-05
GLYCOLYSIS_TCA_GLYOX_BYPASS_superpathway_of_glycolysis,_pyruvate_dehydrogenase,_TCA,_and_glyoxylate_bypass	98.6376	Module II	1e-15	1e-15	4.10622e-05	3.08345e-05	0.000134922	3.49177e-05	3.07851e-05	6.13422e-05
GLYOXYLATE_BYPASS_glyoxylate_cycle	98.9101	Module II	1e-15	1e-15	2.34942e-05	1.80378e-05	0.000104784	2.15558e-05	1.9289e-05	6.02059e-05
HCAMHPDEG_PWY_3_phenylpropanoate_and_3_(3_hydroxyphenyl)propanoate_degradation_to_2_oxopent_4_enoate	93.733	Module II	1e-15	1e-15	8.20323e-06	6.79847e-06	5.56493e-05	1.10145e-05	1.04463e-05	4.39657e-05
KDO_NAGLIPASYN_PWY_superpathway_of_(Kdo)2_lipid_A_biosynthesis	92.0981	Module II	1e-15	1e-15	7.01792e-06	4.47522e-06	4.99543e-05	1.08413e-05	6.12516e-06	3.26428e-05
KETOGLUCONMET_PWY_ketogluconate_metabolism	93.188	Module II	1e-15	1e-15	8.68454e-06	6.69796e-06	5.64186e-05	1.27195e-05	8.88957e-06	4.17404e-05
METHGLYUT_PWY_superpathway_of_methylglyoxal_degradation	89.1008	Module II	1e-15	1e-15	4.43038e-06	4.33013e-06	3.9411e-05	7.37777e-06	6.22981e-06	2.82582e-05
ORNARGDEG_PWY_superpathway_of_L_arginine_and_L_ornithine_degradation	83.3787	Module II	1e-15	1e-15	6.87315e-06	4.67701e-06	4.97028e-05	1.14717e-05	6.94738e-06	3.57259e-05
ORNDEG_PWY_superpathway_of_ornithine_degradation	82.5613	Module II	1e-15	1e-15	1.23802e-05	7.85013e-06	5.17616e-05	1.42426e-05	1.04978e-05	3.64701e-05
POLYISOPRENSYN_PWY_polyisoprenoid_biosynthesis_(E._coli)	97.0027	Module II	1e-15	1e-15	1.22741e-05	9.47873e-06	6.32871e-05	1.33101e-05	1.43345e-05	4.10212e-05
PWY_2723_trehalose_degradation_V	88.8283	Module II	1e-15	1e-15	7.90862e-06	5.91255e-06	6.38315e-05	1.35928e-05	9.13151e-06	3.64096e-05
PWY_4041_&gamma;_glutamyl_cycle	96.7302	Module II	1e-15	1e-15	2.19002e-05	1.80436e-05	0.00011829	2.62627e-05	2.50287e-05	7.25582e-05
PWY_4702_phytate_degradation_I	94.0054	Module II	1e-15	1e-15	4.96923e-06	6.14656e-06	5.83331e-05	8.01326e-06	1.23092e-05	4.21636e-05
PWY_5083_NAD/NADH_phosphorylation_and_dephosphorylation	99.1826	Module II	1e-15	1e-15	4.23405e-05	3.25609e-05	0.000127064	3.85573e-05	3.65908e-05	5.73207e-05
PWY_5138_unsaturated,_even_numbered_fatty_acid_&beta;_oxidation	88.8283	Module II	1e-15	1e-15	4.76423e-06	2.82045e-06	2.56325e-05	7.70738e-06	4.24749e-06	2.32387e-05
PWY_5173_superpathway_of_acetyl_CoA_biosynthesis	98.6376	Module II	1e-15	1e-15	1.83803e-05	1.43738e-05	5.26496e-05	1.90977e-05	2.12718e-05	4.47312e-05
PWY_561_superpathway_of_glyoxylate_cycle_and_fatty_acid_degradation	95.9128	Module II	1e-15	1e-15	2.34437e-05	1.52796e-05	6.57093e-05	1.9418e-05	1.55785e-05	3.97256e-05
PWY_5705_allantoin_degradation_to_glyoxylate_III	92.9155	Module II	1e-15	1e-15	4.39746e-06	3.27268e-06	4.40653e-05	7.66907e-06	4.92366e-06	3.42039e-05
PWY_5723_Rubisco_shunt	97.0027	Module II	1e-15	1e-15	3.63214e-05	2.94283e-05	0.000111326	3.82151e-05	3.6418e-05	4.71516e-05
PWY_5838_superpathway_of_menaquinol_8_biosynthesis_I	96.4578	Module II	1e-15	1e-15	5.06146e-05	3.83489e-05	0.00012055	4.40074e-05	3.76701e-05	4.99112e-05
PWY_5840_superpathway_of_menaquinol_7_biosynthesis	98.9101	Module II	1e-15	1e-15	5.78209e-05	4.6219e-05	0.000113145	3.91498e-05	3.71841e-05	4.66895e-05
PWY_5850_superpathway_of_menaquinol_6_biosynthesis_I	93.188	Module II	1e-15	1e-15	4.26794e-05	3.14112e-05	0.00011109	3.97173e-05	3.14286e-05	4.84398e-05
PWY_5855_ubiquinol_7_biosynthesis_(prokaryotic)	97.0027	Module II	1e-15	1e-15	1.90502e-05	1.27764e-05	7.14491e-05	1.95685e-05	1.72986e-05	4.45372e-05
PWY_5856_ubiquinol_9_biosynthesis_(prokaryotic)	97.0027	Module II	1e-15	1e-15	1.90502e-05	1.27764e-05	7.14491e-05	1.95685e-05	1.72986e-05	4.45372e-05
PWY_5857_ubiquinol_10_biosynthesis_(prokaryotic)	97.0027	Module II	1e-15	1e-15	1.90502e-05	1.27764e-05	7.14491e-05	1.95685e-05	1.72986e-05	4.45372e-05
PWY_5860_superpathway_of_demethylmenaquinol_6_biosynthesis_I	93.188	Module II	1e-15	1e-15	3.07606e-05	2.25987e-05	9.49204e-05	3.01924e-05	2.38588e-05	4.45118e-05
PWY_5861_superpathway_of_demethylmenaquinol_8_biosynthesis	96.4578	Module II	1e-15	1e-15	3.67845e-05	2.83123e-05	0.000104727	3.39702e-05	3.14092e-05	4.63029e-05
PWY_5863_superpathway_of_phylloquinol_biosynthesis	98.9101	Module II	1e-15	1e-15	2.51387e-05	1.9416e-05	7.25114e-05	1.923e-05	1.63077e-05	3.95471e-05
PWY_5896_superpathway_of_menaquinol_10_biosynthesis	93.188	Module II	1e-15	1e-15	4.26794e-05	3.14112e-05	0.00011109	3.97173e-05	3.14286e-05	4.84398e-05
PWY_5898_superpathway_of_menaquinol_12_biosynthesis	98.9101	Module II	1e-15	1e-15	7.0321e-05	5.89302e-05	0.000129447	5.18127e-05	4.95187e-05	5.07304e-05
PWY_5899_superpathway_of_menaquinol_13_biosynthesis	98.9101	Module II	1e-15	1e-15	7.0321e-05	5.89302e-05	0.000129447	5.18127e-05	4.95187e-05	5.07304e-05
PWY_6282_palmitoleate_biosynthesis_I_(from_(5Z)_dodec_5_enoate)	99.7275	Module II	1e-15	1e-15	5.29224e-05	4.59571e-05	0.00011055	4.14111e-05	5.12901e-05	5.01008e-05
PWY_6519_8_amino_7_oxononanoate_biosynthesis_I	99.7275	Module II	1e-15	1e-15	4.5607e-05	4.23931e-05	0.000107323	2.96965e-05	3.94709e-05	4.61061e-05
PWY_6628_superpathway_of_L_phenylalanine_biosynthesis	98.9101	Module II	1e-15	1e-15	6.58586e-05	5.89283e-05	0.00017035	5.38082e-05	5.99263e-05	5.46179e-05
PWY_6629_superpathway_of_L_tryptophan_biosynthesis	90.4632	Module II	1e-15	1e-15	3.38085e-05	2.42888e-05	0.000140211	4.58053e-05	3.19079e-05	6.32109e-05
PWY_6630_superpathway_of_L_tyrosine_biosynthesis	97.8202	Module II	1e-15	1e-15	5.29355e-05	4.49837e-05	0.000145855	4.75243e-05	4.77628e-05	5.01116e-05
PWY_6690_cinnamate_and_3_hydroxycinnamate_degradation_to_2_oxopent_4_enoate	93.733	Module II	1e-15	1e-15	8.20323e-06	6.79847e-06	5.56493e-05	1.10145e-05	1.04463e-05	4.39657e-05
PWY_6803_phosphatidylcholine_acyl_editing	97.2752	Module II	1e-15	1e-15	2.70002e-05	2.05372e-05	9.44057e-05	2.42452e-05	2.37504e-05	5.15653e-05
PWY_6823_molybdenum_cofactor_biosynthesis	90.7357	Module II	1e-15	1e-15	6.80523e-06	4.92815e-06	5.67212e-05	1.09553e-05	8.12804e-06	3.92458e-05
PWY_6859_all_trans_farnesol_biosynthesis	92.9155	Module II	1e-15	1e-15	7.29392e-06	6.59089e-06	5.45754e-05	1.01964e-05	1.00703e-05	4.72822e-05
PWY_6891_thiazole_biosynthesis_II_(Bacillus)	96.1853	Module II	1e-15	1e-15	2.04708e-05	1.79739e-05	9.90439e-05	2.69831e-05	2.38503e-05	4.68923e-05
PWY_6892_thiazole_biosynthesis_I_(E._coli)	99.7275	Module II	1e-15	1e-15	2.76397e-05	2.39907e-05	0.000120295	3.28272e-05	2.86899e-05	5.39317e-05
PWY_6895_superpathway_of_thiamin_diphosphate_biosynthesis_II	96.1853	Module II	1e-15	1e-15	6.5992e-05	5.84308e-05	0.000149419	6.30666e-05	5.88045e-05	5.57994e-05
PWY_7254_TCA_cycle_VII_(acetate_producers)	98.3651	Module II	1e-15	1e-15	2.09988e-05	1.43482e-05	9.01944e-05	2.10872e-05	1.50941e-05	5.35437e-05
PWY_7269_NAD/NADP_NADH/NADPH_mitochondrial_interconversion_(yeast)	95.6403	Module II	1e-15	1e-15	1.96242e-05	1.47715e-05	0.000109547	2.49096e-05	1.79575e-05	5.92469e-05
PWY_7315_dTDP_N_acetylthomosamine_biosynthesis	94.2779	Module II	1e-15	1e-15	1.3067e-05	9.46592e-06	0.000103241	2.07127e-05	1.42542e-05	6.3065e-05
PWY_7388_octanoyl_[acyl_carrier_protein]_biosynthesis_(mitochondria,_yeast)	99.7275	Module II	1e-15	1e-15	4.29155e-05	3.73131e-05	0.000107449	3.79031e-05	5.03093e-05	7.04306e-05
PWY_7409_phospholipid_remodeling_(phosphatidylethanolamine,_yeast)	88.5559	Module II	1e-15	1e-15	7.767e-06	5.6751e-06	7.65151e-05	1.40957e-05	8.71796e-06	5.4559e-05
PWY_7446_sulfoglycolysis	87.7384	Module II	1e-15	1e-15	5.51646e-06	4.13981e-06	5.17144e-05	9.51759e-06	6.97977e-06	4.66508e-05
PWY_7664_oleate_biosynthesis_IV_(anaerobic)	99.7275	Module II	1e-15	1e-15	5.8277e-05	4.88889e-05	0.000119949	4.6153e-05	5.5272e-05	5.34789e-05
PWY0_1061_superpathway_of_L_alanine_biosynthesis	100	Module II	1e-15	1e-15	4.9859e-05	4.38579e-05	0.000151395	4.16978e-05	4.6281e-05	6.55517e-05
PWY0_1241_ADP_L_glycero_&beta;_D_manno_heptose_biosynthesis	98.3651	Module II	1e-15	1e-15	2.12692e-05	1.58706e-05	7.61759e-05	1.90547e-05	2.13111e-05	4.45172e-05
PWY0_1277_3_phenylpropanoate_and_3_(3_hydroxyphenyl)propanoate_degradation	92.9155	Module II	1e-15	1e-15	1.10315e-05	9.52516e-06	6.94707e-05	1.38991e-05	1.2729e-05	5.09087e-05
PWY0_1338_polymyxin_resistance	92.3706	Module II	1e-15	1e-15	6.07e-06	4.20108e-06	5.23364e-05	1.03583e-05	6.13988e-06	3.65156e-05
PWY0_1533_methylphosphonate_degradation_I	91.0082	Module II	1e-15	1e-15	6.90062e-06	5.03318e-06	7.11282e-05	1.17383e-05	7.65136e-06	5.076e-05
PWY0_862_(5Z)_dodec_5_enoate_biosynthesis	99.7275	Module II	1e-15	1e-15	5.33949e-05	4.45757e-05	0.000119408	4.45654e-05	5.32409e-05	5.58689e-05
REDCITCYC_TCA_cycle_VIII_(helicobacter)	99.1826	Module II	1e-15	1e-15	1.97965e-05	1.61392e-05	5.40229e-05	1.74933e-05	1.47842e-05	3.14051e-05
TCA_GLYOX_BYPASS_superpathway_of_glyoxylate_bypass_and_TCA	98.6376	Module II	1e-15	1e-15	2.89372e-05	2.08722e-05	0.000116603	2.74668e-05	2.32912e-05	6.25955e-05
UBISYN_PWY_superpathway_of_ubiquinol_8_biosynthesis_(prokaryotic)	94.8229	Module II	1e-15	1e-15	1.49252e-05	1.05445e-05	6.8665e-05	1.70047e-05	1.47399e-05	4.34911e-05
PWY_1622_formaldehyde_assimilation_I_(serine_pathway)	0.817439	Module III	0.879	0.879	5.46154e-09	5.03185e-09	4.8875e-08	6.20312e-08	6.28478e-08	4.34411e-07
PWY_7268_NAD/NADP_NADH/NADPH_cytosolic_interconversion_(yeast)	3.26975	Module III	0.867	0.869	6.45385e-08	2.02293e-07	5.3875e-08	4.15404e-07	2.28132e-06	4.22379e-07
PWY_4722_creatinine_degradation_II	2.7248	Module III	0.815	0.823	1.16923e-08	2.3121e-08	2.875e-08	8.02509e-08	1.82533e-07	1.85273e-07
PWY_7031_protein_N_glycosylation_(bacterial)	2.45232	Module III	0.814	0.823	2.69231e-08	6.68153e-08	9.25e-09	1.87263e-07	7.91364e-07	5.77662e-08
PWY_7270_L_methionine_salvage_cycle_II_(plants)	2.99728	Module III	0.817	0.822	1.2e-08	2.07006e-08	3.125e-08	9.93161e-08	1.27819e-07	1.81524e-07
PWY1F_823_leucopelargonidin_and_leucocyanidin_biosynthesis	11.4441	Module III	0.651	0.666	2.66154e-08	3.06369e-08	1.64625e-07	1.04267e-07	1.2012e-07	1.19306e-06
P221_PWY_octane_oxidation	9.80926	Module III	0.611	0.627	7.48462e-08	3.20382e-08	3.7e-08	3.1291e-07	1.32971e-07	1.83816e-07
PWY_7374_1,4_dihydroxy_6_naphthoate_biosynthesis_I	0.817439	Module III	0.586	0.604	2.46154e-09	2.06369e-08	0	2.79577e-08	1.8218e-07	0
PWY_7316_dTDP_N_acetylviosamine_biosynthesis	5.99455	Module III	0.518	0.537	5.5e-08	4.15287e-08	2.5125e-08	4.18498e-07	2.96171e-07	1.13314e-07
PWY_5067_glycogen_biosynthesis_II_(from_UDP_D_Glucose)	0.544959	Module III	0.479	0.5	0	1.40127e-09	2.125e-08	0	1.75019e-08	1.88874e-07
PWY3O_1109_superpathway_of_4_hydroxybenzoate_biosynthesis_(yeast)	0.817439	Module III	0.437	0.458	0	3.63057e-09	1.375e-09	0	3.69912e-08	1.22213e-08
PWY_5754_4_hydroxybenzoate_biosynthesis_I_(eukaryotes)	0.817439	Module III	0.437	0.457	0	2.92994e-09	1e-09	0	2.96747e-08	8.88819e-09
PWY_5028_L_histidine_degradation_II	0.544959	Module III	0.426	0.448	5.07692e-09	0	5.25e-09	5.76628e-08	0	4.6663e-08
PWY_5509_adenosylcobalamin_biosynthesis_from_cobyrinate_a,c_diamide_I	0.544959	Module III	0.424	0.447	8.53846e-09	0	4.325e-08	9.69783e-08	0	3.84414e-07
PWY_181_photorespiration	1.08992	Module III	0.391	0.415	5.45385e-08	1.22293e-08	8.3875e-08	6.19438e-07	1.52744e-07	6.69288e-07
PWY_6749_CMP_legionaminate_biosynthesis_I	2.45232	Module III	0.383	0.408	3.13077e-08	1.59045e-07	1.85e-08	1.94214e-07	1.94292e-06	1.15576e-07
PWY_5179_toluene_degradation_V_(aerobic)_(via_toluene_cis_diol)	2.7248	Module III	0.356	0.381	5.30769e-09	2.86624e-09	4.3375e-08	3.66939e-08	2.20032e-08	3.26626e-07
PWY3DJ_35471_L_ascorbate_biosynthesis_IV	2.99728	Module III	0.342	0.366	5.5e-08	2.12102e-08	4.125e-09	3.59421e-07	1.54945e-07	3.66638e-08
PWY_5180_toluene_degradation_I_(aerobic)_(via_o_cresol)	3.54223	Module III	0.306	0.333	5.33462e-07	8.61783e-08	5.40525e-06	3.78694e-06	5.82547e-07	2.86481e-05
PWY_5182_toluene_degradation_II_(aerobic)_(via_4_methylcatechol)	3.54223	Module III	0.306	0.332	5.33462e-07	8.61783e-08	5.40525e-06	3.78694e-06	5.82547e-07	2.86481e-05
PWY_7165_L_ascorbate_biosynthesis_VI_(engineered_pathway)	3.54223	Module III	0.265	0.289	8.03846e-08	2.55414e-08	6.875e-09	4.11121e-07	1.69388e-07	6.11063e-08
DENITRIFICATION_PWY_nitrate_reduction_I_(denitrification)	0.544959	Module III	0.262	0.287	0	3.73885e-08	0	0	4.36861e-07	0
PWY_7094_fatty_acid_salvage	8.17439	Module III	0.229	0.251	4.66923e-08	1.84713e-08	3.625e-08	2.28367e-07	8.08014e-08	1.39699e-07
PWY_7007_methyl_ketone_biosynthesis	0.27248	Module III	0.166	0.185	0	0	3.125e-09	0	0	2.77756e-08
ILEUDEG_PWY_L_isoleucine_degradation_I	0.544959	Module III	0.161	0.18	1.7e-08	0	0	1.51874e-07	0	0
PWY_7528_L_methionine_salvage_cycle_I_(bacteria_and_plants)	5.72207	Module III	0.161	0.18	5.96923e-08	2.52229e-08	1.835e-07	2.82598e-07	1.57398e-07	9.50349e-07
P261_PWY_coenzyme_M_biosynthesis_I	3.54223	Module III	0.138	0.158	4.06154e-08	1.33121e-08	3.1625e-08	2.03174e-07	1.01814e-07	1.98333e-07
PWY_7527_L_methionine_salvage_cycle_III	7.08447	Module III	0.106	0.122	2.18615e-07	5.49682e-08	2.92125e-07	1.24992e-06	3.95456e-07	2.38918e-06
PWY_4361_S_methyl_5_thio_&alpha;_D_ribose_1_phosphate_degradation	8.44687	Module III	0.055	0.065	4.25769e-07	3.40764e-08	3.58625e-07	3.16183e-06	2.45429e-07	1.99685e-06
PWY_6309_L_tryptophan_degradation_XI_(mammalian,_via_kynurenine)	1.08992	Module III	0.031	0.038	0	1.14459e-07	2.0625e-08	0	1.42959e-06	1.63794e-07
PWY_5677_succinate_fermentation_to_butanoate	0.544959	Module III	0.027	0.033	0	0	8.125e-09	0	0	5.85682e-08
UDPNACETYLGALSYN_PWY_UDP_N_acetyl_D_glucosamine_biosynthesis_II	0.544959	Module III	0.027	0.033	0	0	3.85e-08	0	0	2.75446e-07
PWY_7385_1,3_propanediol_biosynthesis_(engineered)	4.08719	Module III	0.021	0.026	8.5e-08	9.74522e-09	1.5975e-07	5.21712e-07	9.61683e-08	7.30515e-07
PWY_7288_fatty_acid_&beta;_oxidation_(peroxisome,_yeast)	2.7248	Module III	0.013	0.016	1.99769e-07	0	5.4625e-08	1.85922e-06	0	2.37392e-07
PWY66_391_fatty_acid_&beta;_oxidation_VI_(peroxisome)	2.7248	Module III	0.013	0.016	2.92308e-07	0	8.7625e-08	2.53656e-06	0	3.62299e-07
PWY_101_photosynthesis_light_reactions	1.90736	Module III	0.00632	0.00827	3.07692e-09	7.19745e-09	1e-08	3.49471e-08	8.98961e-08	4.77232e-08
PWY_6785_hydrogen_production_VIII	1.90736	Module III	0.00622	0.00816	3.92308e-09	4.33121e-09	1.725e-08	4.45576e-08	5.40968e-08	8.17309e-08
PWY0_881_superpathway_of_fatty_acid_biosynthesis_I_(E._coli)	0.817439	Module III	0.00447	0.00592	0	0	2.48375e-07	0	0	1.37449e-06
LIPASYN_PWY_phospholipases	1.90736	Module III	0.000191	0.000291	0	5.5414e-09	3.95e-08	0	6.92121e-08	1.84356e-07
PWY66_375_leukotriene_biosynthesis	1.3624	Module III	0.000115	0.000178	0	0	4.125e-08	0	0	2.80706e-07
RUMP_PWY_formaldehyde_oxidation_I	46.594	Others	0.851	0.855	3.98231e-07	7.41975e-07	5.975e-07	6.96174e-07	1.54553e-06	1.43537e-06
GALACTUROCAT_PWY_D_galacturonate_degradation_I	100	Others	0.8	0.812	0.000120092	0.000118589	0.000114397	4.35765e-05	6.43272e-05	4.91664e-05
PWY_6182_superpathway_of_salicylate_degradation	4.63215	Others	0.7	0.714	6.56923e-08	2.69427e-08	6.2125e-08	3.36605e-07	1.5479e-07	3.57738e-07
P163_PWY_L_lysine_fermentation_to_acetate_and_butanoate	15.2589	Others	0.585	0.688	1.10308e-07	3.16497e-07	3.49e-07	4.14632e-07	1.51821e-06	1.89774e-06
P164_PWY_purine_nucleobases_degradation_I_(anaerobic)	88.8283	Others	0.674	0.688	1.9637e-05	2.2447e-05	2.2079e-05	1.24739e-05	1.57256e-05	1.74523e-05
PWY_6596_adenosine_nucleotides_degradation_I	6.26703	Others	0.606	0.624	1.86692e-07	7.31656e-07	4.08125e-07	9.90179e-07	3.57469e-06	1.68422e-06
PWY_5044_purine_nucleotides_degradation_I_(plants)	6.26703	Others	0.581	0.602	1.99154e-07	4.34459e-07	5.38125e-07	9.38286e-07	1.99286e-06	2.26037e-06
PHOTOALL-PWY:_oxygenic_photosynthesis	0.27248	Others	0.512	0.533	0	6.43312e-09	0	0	8.03497e-08	0
PWY_4981_L_proline_biosynthesis_II_(from_arginine)	100	Others	0.417	0.441	4.69489e-05	4.9485e-05	6.5581e-05	3.68637e-05	5.66434e-05	7.4026e-05
PWY_6876_isopropanol_biosynthesis	28.6104	Others	0.383	0.408	5.63615e-07	1.51414e-06	1.42925e-06	1.61727e-06	7.78847e-06	4.66521e-06
GLYCOGENSYNTH_PWY_glycogen_biosynthesis_I_(from_ADP_D_Glucose)	100	Others	0.337	0.362	0.000116089	0.0001258	0.00012826	4.92278e-05	7.43512e-05	5.71692e-05
PWY_7235_superpathway_of_ubiquinol_6_biosynthesis_(eukaryotic)	22.8883	Others	0.319	0.344	4.63154e-07	1.19025e-06	2.30875e-07	1.31939e-06	3.44482e-06	8.18652e-07
PWY_5920_superpathway_of_heme_biosynthesis_from_glycine	89.1008	Others	0.312	0.337	9.345e-06	9.24236e-06	1.33293e-05	1.01394e-05	1.82701e-05	1.70408e-05
PWY66_399_gluconeogenesis_III	96.4578	Others	0.263	0.288	4.59916e-05	5.33974e-05	4.72309e-05	2.84058e-05	3.89938e-05	4.18297e-05
PWY_2941_L_lysine_biosynthesis_II	100	Others	0.221	0.243	5.63544e-05	7.28771e-05	9.8374e-05	4.84638e-05	7.29215e-05	0.000122184
PWY1G_0_mycothiol_biosynthesis	10.8992	Others	0.192	0.212	2.94615e-08	3.64331e-08	7.0875e-08	1.1934e-07	2.04684e-07	2.17544e-07
PWY_5676_acetyl_CoA_fermentation_to_butanoate_II	99.7275	Others	0.168	0.186	4.60105e-05	5.32925e-05	5.03646e-05	2.06507e-05	3.48712e-05	3.37118e-05
PRPP_PWY_superpathway_of_histidine,_purine,_and_pyrimidine_biosynthesis	99.7275	Others	0.159	0.178	0.000108178	0.000113964	0.000116342	2.87414e-05	3.74282e-05	4.11178e-05
ALL_CHORISMATE_PWY_superpathway_of_chorismate_metabolism	36.5123	Others	0.152	0.171	3.72008e-06	3.75873e-06	4.449e-06	6.21044e-06	7.80997e-06	1.04367e-05
PWY_7389_superpathway_of_anaerobic_energy_metabolism_(invertebrates)	8.99183	Others	0.15	0.169	3.37154e-07	1.33885e-07	2.58125e-07	1.66248e-06	1.03315e-06	9.80496e-07
PWY_7384_anaerobic_energy_metabolism_(invertebrates,_mitochondrial)	8.99183	Others	0.148	0.168	2.12e-07	8.30573e-08	1.7025e-07	1.03914e-06	6.55229e-07	6.79093e-07
PWY_6606_guanosine_nucleotides_degradation_II	99.7275	Others	0.143	0.162	2.07996e-05	2.61973e-05	3.33581e-05	1.21752e-05	2.21036e-05	3.9405e-05
PWY_7294_xylose_degradation_IV	23.9782	Others	0.134	0.153	8.6e-07	5.22038e-07	1.43638e-06	1.90546e-06	2.12633e-06	5.54851e-06
PWY_6470_peptidoglycan_biosynthesis_V_(&beta;_lactam_resistance)	7.08447	Others	0.127	0.146	7.5e-08	9.23567e-08	3.70125e-07	3.2442e-07	6.97908e-07	1.28923e-06
PWY_7117_C4_photosynthetic_carbon_assimilation_cycle,_PEPCK_type	82.5613	Others	0.09	0.103	1.77998e-05	1.75439e-05	2.15656e-05	2.45534e-05	3.17712e-05	4.55523e-05
PWY_622_starch_biosynthesis	10.6267	Others	0.082	0.094	1.07846e-07	1.42739e-07	4.31e-07	4.53049e-07	6.33009e-07	2.30002e-06
GLUCONEO_PWY_gluconeogenesis_I	98.3651	Others	0.08	0.093	7.55262e-05	6.96423e-05	6.32735e-05	4.158e-05	5.39237e-05	4.25309e-05
PWY_4321_L_glutamate_degradation_IV	24.5232	Others	0.08	0.093	5.18692e-07	4.56497e-07	4.8575e-07	1.38167e-06	1.63035e-06	1.25036e-06
TEICHOICACID_PWY_teichoic_acid_(poly_glycerol)_biosynthesis	29.1553	Others	0.076	0.089	1.61615e-07	2.74331e-07	4.245e-07	5.30087e-07	8.15567e-07	1.35405e-06
PWY_6284_superpathway_of_unsaturated_fatty_acids_biosynthesis_(E._coli)	90.4632	Others	0.066	0.077	2.9107e-05	2.55712e-05	3.4809e-05	2.07514e-05	2.52119e-05	3.63307e-05
SER_GLYSYN_PWY_superpathway_of_L_serine_and_glycine_biosynthesis_I	100	Others	0.063	0.074	0.000173589	0.000166073	0.0001623	5.17636e-05	7.47551e-05	6.27747e-05
PWY_5088_L_glutamate_degradation_VIII_(to_propanoate)	21.7984	Others	0.06	0.071	5.31615e-07	8.85987e-07	9.335e-07	2.00495e-06	2.56863e-06	3.39532e-06
PWY_6595_superpathway_of_guanosine_nucleotides_degradation_(plants)	97.5477	Others	0.06	0.071	8.50608e-06	1.29589e-05	1.70487e-05	5.93037e-06	1.35499e-05	3.25514e-05
PWY_1861_formaldehyde_assimilation_II_(RuMP_Cycle)	66.2125	Others	0.055	0.065	1.96115e-06	2.7572e-06	2.16238e-06	2.25636e-06	5.23806e-06	4.68464e-06
TRPSYN_PWY_L_tryptophan_biosynthesis	100	Others	0.045	0.054	0.00017705	0.000171548	0.000185574	8.09373e-05	7.64235e-05	5.95618e-05
PWY66_367_ketogenesis	22.6158	Others	0.043	0.051	2.76538e-07	2.5707e-07	8.63625e-07	7.00044e-07	1.39259e-06	3.01654e-06
PWY_7003_glycerol_degradation_to_butanol	98.0926	Others	0.039	0.046	1.39743e-05	1.79e-05	1.88097e-05	1.22101e-05	1.56694e-05	2.19327e-05
PWY_7200_superpathway_of_pyrimidine_deoxyribonucleoside_salvage	10.0817	Others	0.037	0.045	6.52077e-07	7.99045e-07	9.02375e-07	4.23341e-06	6.08769e-06	2.55755e-06
POLYAMSYN_PWY_superpathway_of_polyamine_biosynthesis_I	100	Others	0.033	0.039	8.45685e-05	7.64441e-05	7.02063e-05	4.89949e-05	5.06898e-05	4.70801e-05
P108_PWY_pyruvate_fermentation_to_propanoate_I	89.9183	Others	0.031	0.037	1.59216e-05	1.43439e-05	1.36026e-05	1.29083e-05	1.50162e-05	1.58427e-05
PWY3O_19_ubiquinol_6_biosynthesis_from_4_hydroxybenzoate_(eukaryotic)	18.8011	Others	0.027	0.033	4.44154e-07	6.28917e-07	2.2775e-07	1.12683e-06	2.04663e-06	8.28078e-07
CATECHOL_ORTHO_CLEAVAGE_PWY_catechol_degradation_to_&beta;_ketoadipate	50.9537	Others	0.026	0.032	2.02992e-06	1.65089e-06	1.62762e-06	4.00836e-06	4.67885e-06	3.12507e-06
ARG+POLYAMINE_SYN_superpathway_of_arginine_and_polyamine_biosynthesis	100	Others	0.025	0.031	9.25412e-05	8.31905e-05	0.000101597	3.81059e-05	5.01313e-05	5.76586e-05
PWY_7383_anaerobic_energy_metabolism_(invertebrates,_cytosol)	96.7302	Others	0.025	0.031	6.1509e-05	5.9411e-05	4.95054e-05	4.34329e-05	5.54312e-05	5.61981e-05
GOLPDLCAT_PWY_superpathway_of_glycerol_degradation_to_1,3_propanediol	100	Others	0.023	0.028	4.07198e-05	4.13477e-05	2.11695e-05	6.29041e-05	5.31002e-05	2.535e-05
PWY_5181_toluene_degradation_III_(aerobic)_(via_p_cresol)	7.08447	Others	0.02	0.025	1.48538e-07	1.35669e-08	2.01625e-07	6.94517e-07	7.86512e-08	8.35541e-07
PWY_6138_CMP_N_acetylneuraminate_biosynthesis_I_(eukaryotes)	9.26431	Others	0.017	0.021	1.08462e-08	8.10191e-08	1.1775e-07	5.73925e-08	3.889e-07	5.04822e-07
P562_PWY_myo_inositol_degradation_I	16.8937	Others	0.016	0.02	1.36e-07	8.54777e-08	1.89875e-07	4.1437e-07	4.04213e-07	4.12412e-07
PWY4LZ_257_superpathway_of_fermentation_(Chlamydomonas_reinhardtii)	98.6376	Others	0.014	0.018	2.36017e-05	2.00071e-05	3.01245e-05	1.75875e-05	1.38883e-05	2.27879e-05
ARGORNPROST_PWY_arginine,_ornithine_and_proline_interconversion	72.4796	Others	0.013	0.016	5.01746e-06	4.32166e-06	3.83963e-06	6.05234e-06	5.64493e-06	6.73639e-06
COBALSYN_PWY_adenosylcobalamin_salvage_from_cobinamide_I	100	Others	0.01	0.013	0.000135047	0.000154289	0.000124909	6.30625e-05	8.11275e-05	5.48221e-05
PWY_5367_petroselinate_biosynthesis	90.4632	Others	0.00927	0.012	2.26375e-05	3.70541e-05	2.26373e-05	2.97502e-05	5.28976e-05	4.3428e-05
PWY_6467_Kdo_transfer_to_lipid_IVA_III_(Chlamydia)	31.8801	Others	0.00956	0.012	9.96462e-07	4.21783e-07	5.66562e-06	3.12478e-06	1.72339e-06	1.80068e-05
PWY_3801_sucrose_degradation_II_(sucrose_synthase)	7.08447	Others	0.00848	0.011	2.44615e-07	1.41975e-07	7.905e-07	1.29869e-06	7.24472e-07	3.66991e-06
PWY_7345_superpathway_of_anaerobic_sucrose_degradation	7.08447	Others	0.00848	0.011	2.29077e-07	1.32675e-07	7.415e-07	1.21745e-06	6.7695e-07	3.45098e-06
ALLANTOINDEG_PWY_superpathway_of_allantoin_degradation_in_yeast	51.4986	Others	0.00759	0.00985	1.05654e-06	6.35605e-07	1.38325e-06	2.13262e-06	1.3582e-06	3.83813e-06
PWY_7115_C4_photosynthetic_carbon_assimilation_cycle,_NAD_ME_type	82.5613	Others	0.0074	0.00962	1.08217e-05	7.7528e-06	1.20762e-05	1.30198e-05	1.17303e-05	1.5541e-05
PWY_6435_4_hydroxybenzoate_biosynthesis_V	29.1553	Others	0.00655	0.00854	1.36685e-06	6.43057e-07	2.7975e-07	2.6451e-06	2.13576e-06	8.74703e-07
PWY_821_superpathway_of_sulfur_amino_acid_biosynthesis_(Saccharomyces_cerevisiae)	95.0954	Others	0.00616	0.00811	1.74229e-05	1.59854e-05	2.66611e-05	1.30107e-05	1.48691e-05	2.62746e-05
PWY_6318_L_phenylalanine_degradation_IV_(mammalian,_via_side_chain)	23.1608	Others	0.00478	0.00631	1.44877e-06	1.08834e-06	1.79312e-06	7.562e-06	7.57996e-06	9.1059e-06
PWY_6396_superpathway_of_2,3_butanediol_biosynthesis	8.44687	Others	0.00415	0.00552	4.14615e-08	8.07006e-08	3.34375e-07	2.0788e-07	6.44846e-07	1.41649e-06
PWY_3781_aerobic_respiration_I_(cytochrome_c)	45.7766	Others	0.00383	0.00512	1.62638e-06	1.87994e-06	3.24812e-06	4.5078e-06	1.14344e-05	9.18137e-06
PWY490_3_nitrate_reduction_VI_(assimilatory)	86.921	Others	0.00351	0.00472	2.897e-06	2.58497e-06	3.46037e-06	1.88948e-06	2.48285e-06	6.51987e-06
PWY_5415_catechol_degradation_I_(meta_cleavage_pathway)	58.5831	Others	0.0033	0.00446	3.14738e-06	2.52707e-06	7.42125e-06	5.45274e-06	5.88652e-06	1.43411e-05
RHAMCAT_PWY_L_rhamnose_degradation_I	100	Others	0.00309	0.00419	0.000135696	0.000147643	0.000154122	5.40674e-05	5.70774e-05	5.51342e-05
PWY_922_mevalonate_pathway_I	52.3161	Others	0.00301	0.00411	8.24769e-07	1.8207e-06	5.33013e-06	1.8293e-06	5.77473e-06	1.40874e-05
PWY66_389_phytol_degradation	63.7602	Others	0.00302	0.00411	5.42485e-06	4.23777e-06	9.25363e-06	8.33477e-06	1.00245e-05	2.04456e-05
PWY_6507_4_deoxy_L_threo_hex_4_enopyranuronate_degradation	100	Others	0.00246	0.00337	0.000118194	9.87847e-05	0.000113832	4.65891e-05	5.8592e-05	5.25465e-05
PWY_6731_starch_degradation_III	42.5068	Others	0.00222	0.00306	9.76154e-07	9.31656e-07	5.78425e-06	2.44481e-06	2.04335e-06	1.29137e-05
PWY_5188_tetrapyrrole_biosynthesis_I_(from_glutamate)	100	Others	0.00219	0.00302	0.000121057	0.000133445	0.000150076	4.86501e-05	5.73314e-05	6.71785e-05
P23_PWY_reductive_TCA_cycle_I	80.654	Others	0.00203	0.00282	1.15898e-05	7.4458e-06	1.00726e-05	1.31237e-05	9.77951e-06	1.06584e-05
PWY_6415_L_ascorbate_biosynthesis_V	57.7657	Others	0.00199	0.00277	2.07985e-06	2.00561e-06	2.09188e-06	2.55616e-06	3.63053e-06	4.4419e-06
PWY_6837_fatty_acid_beta_oxidation_V_(unsaturated,_odd_number,_di_isomerase_dependent)	22.0708	Others	0.00196	0.00274	2.92462e-07	1.32611e-07	2.71625e-07	1.08437e-06	6.99527e-07	8.60618e-07
PWY_241_C4_photosynthetic_carbon_assimilation_cycle,_NADP_ME_type	80.9264	Others	0.00179	0.00251	9.96231e-06	6.91427e-06	4.53763e-06	1.23578e-05	1.12553e-05	5.19449e-06
PWY_6562_norspermidine_biosynthesis	8.99183	Others	0.00153	0.00215	2.26077e-07	1.20382e-07	0	7.05555e-07	5.52765e-07	0
PROTOCATECHUATE_ORTHO_CLEAVAGE_PWY_protocatechuate_degradation_II_(ortho_cleavage_pathway)	66.2125	Others	0.00149	0.0021	3.48777e-06	3.51115e-06	6.427e-06	6.49719e-06	9.5693e-06	1.64175e-05
PWY_6113_superpathway_of_mycolate_biosynthesis	89.1008	Others	0.00116	0.00164	4.46902e-05	3.47483e-05	5.22008e-05	2.9775e-05	3.30935e-05	4.42062e-05
PWY66_398_TCA_cycle_III_(animals)	77.9292	Others	0.00109	0.00155	9.60923e-06	6.09841e-06	7.148e-06	9.61717e-06	7.51324e-06	7.13452e-06
PWY_7279_aerobic_respiration_II_(cytochrome_c)_(yeast)	45.5041	Others	0.00106	0.00151	1.34969e-06	1.27357e-06	2.94825e-06	3.81523e-06	8.43482e-06	8.29403e-06
P42_PWY_incomplete_reductive_TCA_cycle	99.7275	Others	0.00101	0.00144	4.40698e-05	5.79482e-05	5.46786e-05	1.98976e-05	3.18876e-05	3.58027e-05
PWY_6471_peptidoglycan_biosynthesis_IV_(Enterococcus_faecium)	53.951	Others	0.001	0.00144	2.97315e-06	6.8193e-06	1.60468e-05	7.43483e-06	2.35569e-05	3.85603e-05
PWY_7290_Escherichia_coli_serotype_O86_O_antigen_biosynthesis	5.72207	Others	0.000997	0.00143	4.78462e-08	3.13376e-08	2.16625e-07	2.97688e-07	3.24562e-07	1.14956e-06
PWY_5417_catechol_degradation_III_(ortho_cleavage_pathway)	42.7793	Others	0.000864	0.00125	1.06523e-06	4.77389e-07	1.53387e-06	2.21528e-06	1.2525e-06	3.06372e-06
PWY_5431_aromatic_compounds_degradation_via_&beta;_ketoadipate	42.7793	Others	0.000864	0.00125	1.06523e-06	4.77389e-07	1.53387e-06	2.21528e-06	1.2525e-06	3.06372e-06
7ALPHADEHYDROX_PWY_cholate_degradation_(bacteria,_anaerobic)	6.53951	Others	0.000763	0.00111	0	9.38217e-08	9.135e-07	0	4.4097e-07	6.85053e-06
PWY_5910_superpathway_of_geranylgeranyldiphosphate_biosynthesis_I_(via_mevalonate)	49.0463	Others	0.000759	0.00111	7.45846e-07	1.52153e-06	4.33425e-06	1.39919e-06	5.81916e-06	9.75059e-06
PWY_6588_pyruvate_fermentation_to_acetone	98.3651	Others	0.000608	0.000889	7.70077e-06	1.12059e-05	1.6093e-05	6.68697e-06	1.44763e-05	1.66375e-05
LACTOSECAT_PWY_lactose_and_galactose_degradation_I	97.0027	Others	0.000565	0.00083	1.52189e-05	1.61944e-05	3.17805e-05	1.50407e-05	2.44815e-05	5.20497e-05
PYRIDNUCSYN_PWY_NAD_biosynthesis_I_(from_aspartate)	100	Others	0.000458	0.000675	0.000189343	0.000146312	0.000146281	9.50962e-05	7.09036e-05	5.14532e-05
P122_PWY_heterolactic_fermentation	92.0981	Others	0.000448	0.000662	2.74892e-05	2.06317e-05	3.41238e-05	2.67092e-05	2.91908e-05	4.16041e-05
AEROBACTINSYN_PWY_aerobactin_biosynthesis	67.3025	Others	0.000426	0.000631	1.99546e-06	1.35809e-06	1.57964e-05	6.4327e-06	3.41481e-06	3.40973e-05
METSYN_PWY_L_homoserine_and_L_methionine_biosynthesis	100	Others	0.000418	0.000624	0.000129972	0.00015345	0.000161617	4.50735e-05	6.2435e-05	6.10932e-05
PWY_6285_superpathway_of_fatty_acids_biosynthesis_(E._coli)	88.5559	Others	0.000419	0.000623	3.5167e-05	2.75808e-05	4.58411e-05	2.73125e-05	2.87939e-05	3.97913e-05
PWY_5464_superpathway_of_cytosolic_glycolysis_(plants),_pyruvate_dehydrogenase_and_TCA_cycle	97.8202	Others	0.00031	0.000464	2.59676e-05	2.06504e-05	3.4043e-05	2.07323e-05	1.88103e-05	3.31563e-05
PWY_7242_D_fructuronate_degradation	100	Others	2.65e-05	0.000399	0.000122568	0.000109203	0.000140188	5.08037e-05	6.29435e-05	6.23972e-05
GALACT_GLUCUROCAT_PWY_superpathway_of_hexuronide_and_hexuronate_degradation	100	Others	0.000232	0.000349	0.00014318	0.000115226	0.000125175	5.09401e-05	5.8926e-05	5.06908e-05
PWY_7198_pyrimidine_deoxyribonucleotides_de_novo_biosynthesis_IV	96.7302	Others	0.000208	0.000315	1.19142e-05	2.13234e-05	2.12279e-05	1.74073e-05	2.34963e-05	2.92332e-05
PWY_7210_pyrimidine_deoxyribonucleotides_biosynthesis_from_CTP	96.7302	Others	0.000199	0.000303	1.56062e-05	2.68822e-05	2.59721e-05	2.08363e-05	2.70604e-05	3.29905e-05
P185_PWY_formaldehyde_assimilation_III_(dihydroxyacetone_cycle)	100	Others	0.000165	0.000253	2.52368e-05	3.46723e-05	2.60765e-05	2.78927e-05	3.36782e-05	3.3505e-05
PANTOSYN_PWY_pantothenate_and_coenzyme_A_biosynthesis_I	100	Others	0.000157	0.000241	0.000194984	0.000226257	0.000201333	5.37936e-05	7.76561e-05	6.7e-05
PWY_7199_pyrimidine_deoxyribonucleosides_salvage	100	Others	7.97e-05	0.000124	0.000111801	9.83834e-05	0.000121472	3.95749e-05	5.5423e-05	4.92778e-05
PWY_5692_allantoin_degradation_to_glyoxylate_II	75.2044	Others	7.43e-05	0.000116	8.35692e-07	7.29045e-07	2.87762e-06	8.23175e-07	9.9451e-07	4.78432e-06
URDEGR_PWY_superpathway_of_allantoin_degradation_in_plants	75.2044	Others	7.43e-05	0.000116	8.35692e-07	7.29045e-07	2.87762e-06	8.23175e-07	9.9451e-07	4.78432e-06
URSIN_PWY_ureide_biosynthesis	5.17711	Others	7.39e-05	0.000116	0	8.64331e-08	2.26875e-07	0	5.71168e-07	7.86622e-07
P125_PWY_superpathway_of_(R,R)_butanediol_biosynthesis	21.2534	Others	7.03e-05	0.000111	1.09385e-07	3.89363e-07	8.17875e-07	4.41617e-07	2.423e-06	2.60215e-06
PWY_6185_4_methylcatechol_degradation_(ortho_cleavage)	46.049	Others	6.46e-05	0.000102	1.09669e-06	5.65032e-07	2.45375e-06	2.17688e-06	1.6332e-06	4.78421e-06
MET_SAM_PWY_superpathway_of_S_adenosyl_L_methionine_biosynthesis	100	Others	5.58e-05	8.84e-05	0.000131695	0.000153959	0.000171512	4.92975e-05	6.84496e-05	6.18625e-05
CRNFORCAT_PWY_creatinine_degradation_I	58.8556	Others	3.16e-05	5.04e-05	4.10777e-06	3.96242e-06	1.57775e-06	4.96579e-06	5.71015e-06	2.84647e-06
PWY_6549_L_glutamine_biosynthesis_III	85.5586	Others	2.54e-05	4.07e-05	9.18823e-06	6.82516e-06	5.71875e-06	9.09128e-06	1.01334e-05	6.67545e-06
PWY_5005_biotin_biosynthesis_II	94.2779	Others	1.74e-05	2.81e-05	2.93935e-05	4.25257e-05	2.23599e-05	2.51465e-05	4.14814e-05	2.70893e-05
PWY_6305_putrescine_biosynthesis_IV	100	Others	1.39e-05	2.24e-05	0.000112593	9.14977e-05	8.8665e-05	4.27876e-05	4.75498e-05	4.35767e-05
PWY_5100_pyruvate_fermentation_to_acetate_and_lactate_II	100	Others	4.69e-06	7.63e-06	0.000121252	0.000130037	0.000110655	3.70481e-05	6.55999e-05	0.000119327
LPSSYN_PWY_superpathway_of_lipopolysaccharide_biosynthesis	72.2071	Others	4.39e-06	7.18e-06	7.15162e-06	4.35873e-06	3.04751e-05	1.27143e-05	7.52476e-06	3.90613e-05
GLUDEG_I_PWY_GABA_shunt	97.8202	Others	3.97e-06	6.51e-06	1.68885e-05	2.29139e-05	4.25084e-05	1.41515e-05	2.37669e-05	3.58865e-05
P124_PWY_Bifidobacterium_shunt	81.7439	Others	3.15e-06	5.18e-06	4.01869e-06	4.63637e-06	2.35375e-06	6.07502e-06	7.46218e-06	4.73467e-06
PWY_1269_CMP_3_deoxy_D_manno_octulosonate_biosynthesis_I	100	Others	2.87e-06	4.74e-06	0.000123722	0.000154003	0.00016511	7.59362e-05	8.15107e-05	7.1037e-05
PWY_5345_superpathway_of_L_methionine_biosynthesis_(by_sulfhydrylation)	100	Others	1.71e-06	2.83e-06	6.47335e-05	6.16188e-05	8.76744e-05	3.33718e-05	4.20685e-05	3.96978e-05
PWY_5347_superpathway_of_L_methionine_biosynthesis_(transsulfuration)	100	Others	1.4e-06	2.32e-06	0.000128181	0.00015479	0.000166902	4.03459e-05	5.86092e-05	5.89374e-05
PWY_5941_glycogen_degradation_II_(eukaryotic)	87.4659	Others	8.94e-07	1.49e-06	5.31115e-06	1.36439e-05	1.26997e-05	5.14017e-06	1.81097e-05	2.31982e-05
HEME_BIOSYNTHESIS_II_heme_biosynthesis_I_(aerobic)	99.7275	Others	4.69e-07	7.96e-07	1.61265e-05	2.00656e-05	3.51366e-05	1.20586e-05	3.12931e-05	2.92414e-05
PWY_5104_L_isoleucine_biosynthesis_IV	98.3651	Others	4.56e-07	7.77e-07	5.76822e-05	5.83445e-05	2.81104e-05	4.81105e-05	5.68542e-05	3.33802e-05
PWY_7237_myo_,_chiro__and_scillo_inositol_degradation	99.7275	Others	3.75e-07	6.41e-07	8.07273e-05	8.56537e-05	3.29039e-05	0.00011217	0.000101029	5.45706e-05
COA_PWY_coenzyme_A_biosynthesis_I	100	Others	3.73e-07	6.4e-07	0.00012271	0.000150629	0.000169398	4.20913e-05	7.78692e-05	7.17598e-05
OANTIGEN_PWY_O_antigen_building_blocks_biosynthesis_(E._coli)	100	Others	2.28e-07	3.94e-07	8.18481e-05	9.76233e-05	0.0001276	4.01557e-05	7.4009e-05	6.00862e-05
PWY_7013_L_1,2_propanediol_degradation	90.4632	Others	2.17e-07	3.77e-07	3.28452e-05	2.44518e-05	7.72527e-05	3.95137e-05	4.06681e-05	9.46019e-05
PWY0_162_superpathway_of_pyrimidine_ribonucleotides_de_novo_biosynthesis	100	Others	2.1e-07	3.67e-07	0.000220931	0.000265576	0.000184397	0.000118721	0.000118076	6.52003e-05
PWY0_1479_tRNA_processing	79.0191	Others	1.28e-07	2.24e-07	1.37474e-05	1.27497e-05	7.69975e-06	1.23275e-05	3.00894e-05	1.48067e-05
GLYCOCAT_PWY_glycogen_degradation_I_(bacterial)	99.1826	Others	1.25e-07	2.21e-07	3.74839e-05	4.47692e-05	6.245e-05	2.98699e-05	4.23661e-05	2.70614e-05
PWY_5004_superpathway_of_L_citrulline_metabolism	40.0545	Others	1.18e-07	2.09e-07	2.21815e-06	1.24981e-06	5.035e-07	2.90012e-06	2.62028e-06	1.15472e-06
PWY_6263_superpathway_of_menaquinol_8_biosynthesis_II	78.7466	Others	8.25e-08	1.46e-07	1.19151e-05	1.05954e-05	5.98763e-06	1.60975e-05	1.50145e-05	1.58917e-05
HISDEG_PWY_L_histidine_degradation_I	100	Others	5.27e-08	9.43e-08	5.77272e-05	4.67261e-05	3.34563e-05	3.74909e-05	4.14059e-05	3.4452e-05
HOMOSER_METSYN_PWY_L_methionine_biosynthesis_I	100	Others	2.05e-08	3.74e-08	7.69378e-05	9.50812e-05	0.000118435	3.17584e-05	4.58455e-05	5.45892e-05
PWY_7399_methylphosphonate_degradation_II	18.8011	Others	9.57e-09	1.76e-08	2.64615e-08	4.44968e-07	1.22688e-06	1.83344e-07	1.29474e-06	3.2035e-06
PWY_7392_taxadiene_biosynthesis_(engineered)	90.4632	Others	3.81e-09	7.06e-09	1.47077e-05	1.30928e-05	3.47988e-05	1.56629e-05	1.95133e-05	3.5402e-05
PWY_5505_L_glutamate_and_L_glutamine_biosynthesis	96.1853	Others	2e-09	3.77e-09	1.68718e-05	1.48541e-05	3.37841e-05	1.14453e-05	1.65715e-05	2.4636e-05
GLUCUROCAT_PWY_superpathway_of_&beta;_D_glucuronide_and_D_glucuronate_degradation	100	Others	1.94e-09	3.66e-09	0.000153156	0.00010775	0.000127902	5.9093e-05	5.76105e-05	5.39081e-05
CENTFERM_PWY_pyruvate_fermentation_to_butanoate	86.376	Others	1.63e-09	3.1e-09	8.70677e-06	9.2042e-06	3.801e-06	6.62978e-06	7.99245e-06	5.50192e-06
PWY_6531_mannitol_cycle	95.6403	Others	1.54e-09	2.94e-09	5.62192e-06	1.47787e-05	1.86135e-05	6.59513e-06	1.50381e-05	2.55601e-05
PWY_6590_superpathway_of_Clostridium_acetobutylicum_acidogenic_fermentation	86.376	Others	1.24e-09	2.37e-09	1.08625e-05	1.14504e-05	4.697e-06	8.07404e-06	9.84939e-06	6.46359e-06
PWY_5971_palmitate_biosynthesis_II_(bacteria_and_plants)	90.4632	Others	1.03e-09	1.98e-09	6.02235e-05	4.47209e-05	8.754e-05	4.20484e-05	4.84314e-05	5.39057e-05
PWY_5022_4_aminobutanoate_degradation_V	98.9101	Others	5.92e-10	1.14e-09	2.27358e-05	2.62164e-05	5.44422e-05	1.83581e-05	2.97504e-05	3.86305e-05
PWY_7211_superpathway_of_pyrimidine_deoxyribonucleotides_de_novo_biosynthesis	100	Others	5.99e-11	1.19e-10	0.00010974	0.000142998	8.28517e-05	4.66763e-05	7.46059e-05	5.02066e-05
THRESYN_PWY_superpathway_of_L_threonine_biosynthesis	100	Others	5.01e-11	9.99e-11	0.000211581	0.000261171	0.00023394	3.83667e-05	6.54769e-05	7.57394e-05
PWY_5690_TCA_cycle_II_(plants_and_fungi)	100	Others	4.35e-11	8.72e-11	7.29725e-05	6.97566e-05	0.000124423	5.61242e-05	5.18013e-05	6.67442e-05
HSERMETANA_PWY_L_methionine_biosynthesis_III	100	Others	3.13e-11	6.34e-11	6.48979e-05	8.75585e-05	5.73863e-05	2.67254e-05	4.31414e-05	4.53648e-05
PWY_5030_L_histidine_degradation_III	99.7275	Others	2.59e-11	5.27e-11	2.84557e-05	3.61264e-05	1.7016e-05	1.39992e-05	2.33063e-05	1.43847e-05
HISTSYN_PWY_L_histidine_biosynthesis	100	Others	2.03e-11	4.17e-11	0.000121948	0.000173564	0.000196109	4.12619e-05	8.35854e-05	0.000126102
PWY_5659_GDP_mannose_biosynthesis	100	Others	1.32e-11	2.74e-11	0.000102182	0.00014701	0.000131562	3.91508e-05	6.08879e-05	5.55088e-05
PWY66_400_glycolysis_VI_(metazoan)	100	Others	8.23e-12	1.72e-11	0.00014706	0.00017359	0.000222249	0.000110101	0.000108564	6.27793e-05
P461_PWY_hexitol_fermentation_to_lactate,_formate,_ethanol_and_acetate	100	Others	8.1e-12	1.7e-11	7.71912e-05	7.63077e-05	0.000130943	7.64552e-05	6.48531e-05	6.71159e-05
PWY0_41_allantoin_degradation_IV_(anaerobic)	76.0218	Others	5.3e-12	1.12e-11	9.35e-07	7.98408e-07	4.0035e-06	9.82587e-07	1.14956e-06	5.81092e-06
PWY_4984_urea_cycle	97.5477	Others	2.21e-12	4.69e-12	1.97765e-05	4.04118e-05	1.99577e-05	1.46563e-05	4.52944e-05	2.51456e-05
PWY_6270_isoprene_biosynthesis_I	99.1826	Others	1.89e-12	4.02e-12	0.000132629	0.000112667	0.000184683	6.69798e-05	7.11177e-05	6.42648e-05
PWY_5177_glutaryl_CoA_degradation	98.6376	Others	1.23e-12	2.63e-12	7.47002e-05	6.88704e-05	3.86198e-05	3.29607e-05	4.46627e-05	3.33736e-05
P161_PWY_acetylene_degradation	99.7275	Others	1.2e-12	2.59e-12	3.4479e-05	3.11308e-05	6.37264e-05	2.76214e-05	2.82915e-05	4.09464e-05
POLYAMINSYN3_PWY_superpathway_of_polyamine_biosynthesis_II	92.6431	Others	1.06e-12	2.3e-12	2.56397e-05	1.49946e-05	8.71075e-06	2.05293e-05	1.61412e-05	1.08575e-05
CITRULBIO_PWY_L_citrulline_biosynthesis	98.0926	Others	7e-13	1.52e-12	2.32772e-05	4.65546e-05	2.30704e-05	1.67095e-05	4.75329e-05	2.77538e-05
ANAEROFRUCAT_PWY_homolactic_fermentation	100	Others	1.97e-13	4.32e-13	0.00016743	0.000204773	0.000219895	4.10454e-05	5.45115e-05	5.04848e-05
PWY_7560_methylerythritol_phosphate_pathway_II	99.1826	Others	1.59e-13	3.5e-13	0.000119999	0.000102869	0.000176178	6.21669e-05	6.71944e-05	6.39219e-05
PENTOSE_P_PWY_pentose_phosphate_pathway	100	Others	1.3e-13	2.87e-13	6.7729e-05	8.24495e-05	0.000116049	3.24007e-05	5.66985e-05	4.3234e-05
PWY_5918_superpathay_of_heme_biosynthesis_from_glutamate	99.7275	Others	7.23e-14	1.61e-13	2.70922e-05	2.36497e-05	5.12919e-05	1.7601e-05	3.30855e-05	3.36073e-05
PWY_7400_L_arginine_biosynthesis_IV_(archaebacteria)	100	Others	4.27e-14	9.57e-14	0.000185303	0.000225865	0.000330964	7.21431e-05	0.000123464	0.000157144
PWY0_781_aspartate_superpathway	100	Others	3.36e-14	7.58e-14	7.57933e-05	8.40346e-05	0.000125682	3.89027e-05	5.05539e-05	3.90037e-05
PWY_7196_superpathway_of_pyrimidine_ribonucleosides_salvage	99.455	Others	3.12e-14	7.08e-14	0.000131162	0.000139815	6.09892e-05	7.55557e-05	8.17604e-05	5.05928e-05
3_HYDROXYPHENYLACETATE_DEGRADATION_PWY_4_hydroxyphenylacetate_degradation	77.9292	Others	1.84e-14	4.19e-14	3.54538e-06	2.77561e-06	3.7305e-05	5.97475e-06	5.13434e-06	4.01126e-05
PWY_5747_2_methylcitrate_cycle_II	85.0136	Others	9.7e-15	2.22e-14	4.64108e-06	2.29962e-06	1.08054e-05	6.1379e-06	3.51854e-06	1.27878e-05
PWY_5989_stearate_biosynthesis_II_(bacteria_and_plants)	99.7275	Others	6.24e-15	1.44e-14	5.52617e-05	6.297e-05	0.000106834	3.11991e-05	5.12632e-05	4.54912e-05
FAO_PWY_fatty_acid_&beta;_oxidation_I	98.9101	Others	5.2e-15	1.21e-14	2.83235e-05	1.98361e-05	5.14388e-05	1.87397e-05	1.7363e-05	3.28474e-05
P162_PWY_L_glutamate_degradation_V_(via_hydroxyglutarate)	97.2752	Others	4.11e-15	9.63e-15	1.76033e-05	1.95467e-05	8.53375e-06	9.35917e-06	1.39495e-05	8.14451e-06
PWY_7371_1,4_dihydroxy_6_naphthoate_biosynthesis_II	77.9292	Others	3.82e-15	8.98e-15	2.3452e-05	2.45637e-05	4.1105e-06	3.998e-05	3.3398e-05	1.62668e-05
PWY_5136_fatty_acid_&beta;_oxidation_II_(peroxisome)	98.9101	Others	2.63e-15	6.21e-15	2.39138e-05	1.63885e-05	4.55474e-05	1.65398e-05	1.51943e-05	3.11034e-05
PWY_5675_nitrate_reduction_V_(assimilatory)	56.9482	Others	1.33e-15	3.17e-15	2.14331e-06	1.04108e-06	3.91262e-06	4.99202e-06	3.11761e-06	6.59381e-06
PWYG_321_mycolate_biosynthesis	98.3651	Others	1.18e-15	2.83e-15	5.73652e-05	4.84418e-05	0.000108297	4.36314e-05	5.10424e-05	5.34203e-05
DAPLYSINESYN_PWY_L_lysine_biosynthesis_I	100	Others	1e-15	1.17e-15	8.47095e-05	9.47572e-05	0.000153232	4.80557e-05	6.43748e-05	5.08454e-05
ARGININE_SYN4_PWY_L_ornithine_de_novo__biosynthesis	98.6376	Others	1e-15	1e-15	5.13057e-05	0.000179157	8.56806e-05	3.86283e-05	0.0001071	0.000100026
ARGSYN_PWY_L_arginine_biosynthesis_I_(via_L_ornithine)	100	Others	1e-15	1e-15	0.000172319	0.000213047	0.000329685	7.15876e-05	0.000122793	0.000157484
ARGSYNBSUB_PWY_L_arginine_biosynthesis_II_(acetyl_cycle)	100	Others	1e-15	1e-15	9.87059e-05	0.000134523	0.000328528	6.06851e-05	0.000110651	0.000173938
COLANSYN_PWY_colanic_acid_building_blocks_biosynthesis	100	Others	1e-15	1e-15	5.37886e-05	6.26537e-05	9.134e-05	2.42817e-05	3.175e-05	2.85213e-05
FERMENTATION_PWY_mixed_acid_fermentation	99.455	Others	1e-15	1e-15	3.81905e-05	3.17585e-05	8.37459e-05	2.5101e-05	2.39185e-05	4.53285e-05
FOLSYN_PWY_superpathway_of_tetrahydrofolate_biosynthesis_and_salvage	99.7275	Others	1e-15	1e-15	2.49052e-05	2.53872e-05	0.000100222	1.83611e-05	1.95443e-05	4.64327e-05
GLUTORN_PWY_L_ornithine_biosynthesis	100	Others	1e-15	1e-15	6.85496e-05	9.89991e-05	0.000287869	5.00785e-05	9.37319e-05	0.000173605
GLYCOLYSIS_E_D_superpathway_of_glycolysis_and_Entner_Doudoroff	100	Others	1e-15	1e-15	5.72181e-05	5.67464e-05	0.000125666	3.09002e-05	3.39417e-05	4.71393e-05
GLYCOLYSIS_glycolysis_I_(from_glucose_6_phosphate)	100	Others	1e-15	1e-15	0.000126272	0.000149245	0.000237921	5.38443e-05	7.27193e-05	6.14914e-05
HEMESYN2_PWY_heme_biosynthesis_II_(anaerobic)	100	Others	1e-15	1e-15	3.02938e-05	3.26568e-05	9.89021e-05	2.11344e-05	3.89432e-05	5.66822e-05
HEXITOLDEGSUPER_PWY_superpathway_of_hexitol_degradation_(bacteria)	100	Others	1e-15	1e-15	7.11171e-05	8.21809e-05	0.000142829	3.17244e-05	3.81503e-05	3.67057e-05
NAD_BIOSYNTHESIS_II_NAD_salvage_pathway_II	100	Others	1e-15	1e-15	3.24575e-05	2.729e-05	0.000112039	2.78027e-05	3.71388e-05	6.10048e-05
NAGLIPASYN_PWY_lipid_IVA_biosynthesis	100	Others	1e-15	1e-15	4.41142e-05	3.5443e-05	9.20021e-05	3.3019e-05	3.39434e-05	4.18085e-05
P105_PWY_TCA_cycle_IV_(2_oxoglutarate_decarboxylase)	96.1853	Others	1e-15	1e-15	3.00217e-05	2.16937e-05	0.000121007	2.56336e-05	2.09685e-05	7.00155e-05
P4_PWY_superpathway_of_L_lysine,_L_threonine_and_L_methionine_biosynthesis_I	100	Others	1e-15	1e-15	7.60633e-05	8.5992e-05	0.000133216	3.976e-05	5.28413e-05	4.12562e-05
P441_PWY_superpathway_of_N_acetylneuraminate_degradation	100	Others	1e-15	1e-15	6.60374e-05	6.79623e-05	0.000122384	3.23392e-05	3.11385e-05	3.50925e-05
PHOSLIPSYN_PWY_superpathway_of_phospholipid_biosynthesis_I_(bacteria)	100	Others	1e-15	1e-15	0.000124493	0.000139584	0.000203428	5.53449e-05	6.81799e-05	5.37622e-05
PPGPPMET_PWY_ppGpp_biosynthesis	100	Others	1e-15	1e-15	3.38678e-05	2.44462e-05	6.28839e-05	2.40047e-05	2.89928e-05	3.25628e-05
PWY_4242_pantothenate_and_coenzyme_A_biosynthesis_III	100	Others	1e-15	1e-15	7.88475e-05	9.67739e-05	0.000150898	3.1246e-05	6.4488e-05	6.51971e-05
PWY_5101_L_isoleucine_biosynthesis_II	99.455	Others	1e-15	1e-15	2.36042e-05	9.4789e-05	3.6177e-05	2.13622e-05	6.07582e-05	3.57021e-05
PWY_5121_superpathway_of_geranylgeranyl_diphosphate_biosynthesis_II_(via_MEP)	99.455	Others	1e-15	1e-15	5.47168e-05	4.53339e-05	9.86041e-05	2.68916e-05	3.28646e-05	4.12788e-05
PWY_5154_L_arginine_biosynthesis_III_(via_N_acetyl_L_citrulline)	100	Others	1e-15	1e-15	5.92614e-05	9.71832e-05	0.000150213	3.17329e-05	6.66552e-05	5.40575e-05
PWY_5189_tetrapyrrole_biosynthesis_II_(from_glycine)	100	Others	1e-15	1e-15	4.64246e-05	2.27271e-05	9.42721e-05	2.84848e-05	3.42895e-05	4.87001e-05
PWY_5384_sucrose_degradation_IV_(sucrose_phosphorylase)	99.455	Others	1e-15	1e-15	1.01154e-05	1.14851e-05	6.3941e-05	1.40133e-05	1.24353e-05	3.71273e-05
PWY_5484_glycolysis_II_(from_fructose_6_phosphate)	100	Others	1e-15	1e-15	0.000112373	0.00014434	0.000219303	4.69552e-05	7.01726e-05	5.94677e-05
PWY_5656_mannosylglycerate_biosynthesis_I	82.5613	Others	1e-15	1e-15	1.96508e-06	2.41567e-06	1.20814e-05	2.65869e-06	5.29302e-06	1.0727e-05
PWY_5791_1,4_dihydroxy_2_naphthoate_biosynthesis_II_(plants)	98.9101	Others	1e-15	1e-15	3.01209e-05	2.58478e-05	8.69074e-05	2.64208e-05	2.97102e-05	4.53455e-05
PWY_5837_1,4_dihydroxy_2_naphthoate_biosynthesis_I	98.9101	Others	1e-15	1e-15	3.01209e-05	2.58478e-05	8.69074e-05	2.64208e-05	2.97102e-05	4.53455e-05
PWY_5845_superpathway_of_menaquinol_9_biosynthesis	93.188	Others	1e-15	1e-15	4.26794e-05	3.14112e-05	0.00011109	3.97173e-05	3.14286e-05	4.84398e-05
PWY_5862_superpathway_of_demethylmenaquinol_9_biosynthesis	93.188	Others	1e-15	1e-15	3.07606e-05	2.25987e-05	9.49204e-05	3.01924e-05	2.38588e-05	4.45118e-05
PWY_5897_superpathway_of_menaquinol_11_biosynthesis	98.9101	Others	1e-15	1e-15	7.0321e-05	5.89302e-05	0.000129447	5.18127e-05	4.95187e-05	5.07304e-05
PWY_5913_TCA_cycle_VI_(obligate_autotrophs)	99.1826	Others	1e-15	1e-15	2.28552e-05	1.93152e-05	8.17314e-05	1.82227e-05	2.20263e-05	5.57157e-05
PWY_6147_6_hydroxymethyl_dihydropterin_diphosphate_biosynthesis_I	100	Others	1e-15	1e-15	3.98149e-05	4.57767e-05	0.000115171	2.65659e-05	6.55713e-05	6.11251e-05
PWY_6353_purine_nucleotides_degradation_II_(aerobic)	100	Others	1e-15	1e-15	5.51942e-05	5.67654e-05	0.000171634	3.03517e-05	3.61187e-05	7.60492e-05
PWY_6608_guanosine_nucleotides_degradation_III	100	Others	1e-15	1e-15	6.80384e-05	6.94501e-05	0.000171858	4.23203e-05	4.81545e-05	8.51091e-05
PWY_6612_superpathway_of_tetrahydrofolate_biosynthesis	99.7275	Others	1e-15	1e-15	1.85279e-05	1.78139e-05	8.82985e-05	1.55051e-05	1.433e-05	5.45545e-05
PWY_6708_ubiquinol_8_biosynthesis_(prokaryotic)	97.0027	Others	1e-15	1e-15	1.90502e-05	1.27764e-05	7.14491e-05	1.95685e-05	1.72986e-05	4.45372e-05
PWY_6901_superpathway_of_glucose_and_xylose_degradation	100	Others	1e-15	1e-15	6.73022e-05	7.75616e-05	0.000138732	3.37529e-05	4.52842e-05	3.4682e-05
PWY_6936_seleno_amino_acid_biosynthesis	100	Others	1e-15	1e-15	6.8544e-05	0.000101071	0.000180416	4.10064e-05	7.20026e-05	8.33744e-05
PWY_6969_TCA_cycle_V_(2_oxoglutarateferredoxin_oxidoreductase)	100	Others	1e-15	1e-15	6.48559e-05	6.21788e-05	0.000140662	2.78486e-05	3.47668e-05	6.68648e-05
PWY_7209_superpathway_of_pyrimidine_ribonucleosides_degradation	48.5014	Others	1e-15	1e-15	9.74462e-07	3.28987e-06	2.23375e-06	2.15501e-06	8.19928e-06	4.16796e-06
PWY_7234_inosine_5'_phosphate_biosynthesis_III	100	Others	1e-15	1e-15	6.73565e-05	0.000102451	0.000161639	3.93479e-05	8.07234e-05	0.000111427
PWY_7282_4_amino_2_methyl_5_phosphomethylpyrimidine_biosynthesis_(yeast)	99.7275	Others	1e-15	1e-15	0.000117697	0.000233715	0.000137145	5.08838e-05	8.97274e-05	9.16432e-05
PWY_7323_superpathway_of_GDP_mannose_derived_O_antigen_building_blocks_biosynthesis	100	Others	1e-15	1e-15	4.18323e-05	5.93439e-05	9.04355e-05	2.22839e-05	4.07697e-05	5.08681e-05
PWY_7328_superpathway_of_UDP_glucose_derived_O_antigen_building_blocks_biosynthesis	96.1853	Others	1e-15	1e-15	1.13337e-05	9.36255e-06	4.5249e-05	1.20386e-05	9.03351e-06	2.12729e-05
PWY_7456_mannan_degradation	81.7439	Others	1e-15	1e-15	8.63012e-05	3.33453e-05	1.88834e-05	3.60426e-05	4.41945e-05	2.91535e-05
PWY_7539_6_hydroxymethyl_dihydropterin_diphosphate_biosynthesis_III_(Chlamydia)	100	Others	1e-15	1e-15	3.08407e-05	3.82111e-05	9.30344e-05	1.85929e-05	4.11602e-05	5.48746e-05
PWY0_1261_anhydromuropeptides_recycling	100	Others	1e-15	1e-15	6.08141e-05	6.23965e-05	0.000194085	3.8796e-05	4.51e-05	7.6836e-05
PWY0_1297_superpathway_of_purine_deoxyribonucleosides_degradation	100	Others	1e-15	1e-15	6.05125e-05	6.41388e-05	0.000168621	4.22213e-05	4.90031e-05	6.17001e-05
PWY0_1298_superpathway_of_pyrimidine_deoxyribonucleosides_degradation	100	Others	1e-15	1e-15	2.13375e-05	2.35343e-05	8.75561e-05	1.71747e-05	1.95006e-05	4.34459e-05
PWY0_1415_superpathway_of_heme_biosynthesis_from_uroporphyrinogen_III	97.8202	Others	1e-15	1e-15	1.17898e-05	1.15455e-05	3.6893e-05	1.17162e-05	1.7064e-05	2.89477e-05
PWY0_1586_peptidoglycan_maturation_(meso_diaminopimelate_containing)	100	Others	1e-15	1e-15	0.000120819	0.000150307	0.000321571	5.53864e-05	5.37852e-05	0.000162484
PWY0_321_phenylacetate_degradation_I_(aerobic)	66.7575	Others	1e-15	1e-15	3.18754e-06	2.25656e-06	2.96405e-05	6.27986e-06	4.96994e-06	3.05185e-05
PWY0_42_2_methylcitrate_cycle_I	82.0163	Others	1e-15	1e-15	4.13538e-06	1.95006e-06	1.17407e-05	6.08357e-06	3.1657e-06	1.31644e-05
PWY0_845_superpathway_of_pyridoxal_5'_phosphate_biosynthesis_and_salvage	99.7275	Others	1e-15	1e-15	6.97658e-05	0.000207893	0.000111768	4.37442e-05	9.95524e-05	9.95212e-05
PWY4FS_7_phosphatidylglycerol_biosynthesis_I_(plastidic)	100	Others	1e-15	1e-15	0.000126927	0.000103148	0.000201333	8.55633e-05	5.92295e-05	6.03341e-05
PWY4FS_8_phosphatidylglycerol_biosynthesis_II_(non_plastidic)	100	Others	1e-15	1e-15	0.000126925	0.000103003	0.000201314	8.55611e-05	5.87817e-05	6.0329e-05
PWY66_409_superpathway_of_purine_nucleotide_salvage	100	Others	1e-15	1e-15	9.89955e-05	0.00010859	0.000191626	4.86368e-05	6.11255e-05	5.52216e-05
PYRIDNUCSAL_PWY_NAD_salvage_pathway_I	98.0926	Others	1e-15	1e-15	2.6093e-05	2.70599e-05	8.03556e-05	1.85593e-05	2.39559e-05	4.3951e-05
RIBOSYN2_PWY_flavin_biosynthesis_I_(bacteria_and_plants)	99.455	Others	1e-15	1e-15	6.60495e-05	8.00505e-05	0.000157696	4.43612e-05	6.34764e-05	5.05861e-05
SALVADEHYPOX_PWY_adenosine_nucleotides_degradation_II	100	Others	1e-15	1e-15	4.29868e-05	4.49502e-05	0.000156792	2.5672e-05	3.65475e-05	8.27653e-05
SO4ASSIM_PWY_sulfate_reduction_I_(assimilatory)	100	Others	1e-15	1e-15	6.60795e-05	5.82663e-05	0.000141447	4.69611e-05	6.33047e-05	6.01074e-05
SULFATE_CYS_PWY_superpathway_of_sulfate_assimilation_and_cysteine_biosynthesis	100	Others	1e-15	1e-15	6.39475e-05	5.20037e-05	0.00012583	3.70547e-05	3.81133e-05	4.66014e-05
TCA_TCA_cycle_I_(prokaryotic)	100	Others	1e-15	1e-15	7.19615e-05	7.02798e-05	0.00015296	3.09677e-05	3.806e-05	6.36686e-05
THISYN_PWY_superpathway_of_thiamin_diphosphate_biosynthesis_I	99.7275	Others	1e-15	1e-15	8.51378e-05	7.48778e-05	0.000163473	6.76254e-05	6.39832e-05	5.74004e-05
