# Supplementary material for: Metapangenomics reveals an increased proportion of an Escherichia coli-dominated enterotype in older Chinese people
Source: Research Square preprint supplement (doi:10.21203/rs.3.rs-1344848/v1), 2022-02-11
Supplement: Supplementary file 3 [file eee3af96df537ab0a76d2809.xls]

## Sheet: Sheet1
Source	Target	Weight
AST_PWY__L_arginine_degradation_II_(AST_pathway)	NONMEVIPP_PWY__methylerythritol_phosphate_pathway_I	-0.138786
AST_PWY__L_arginine_degradation_II_(AST_pathway)	PWY_6387__UDP_N_acetylmuramoyl_pentapeptide_biosynthesis_I_(meso_diaminopimelate_containing)	-0.136921
AST_PWY__L_arginine_degradation_II_(AST_pathway)	PWY_6386__UDP_N_acetylmuramoyl_pentapeptide_biosynthesis_II_(lysine_containing)	-0.135923
AST_PWY__L_arginine_degradation_II_(AST_pathway)	PEPTIDOGLYCANSYN_PWY__peptidoglycan_biosynthesis_I_(meso_diaminopimelate_containing)	-0.135291
PWY_6387__UDP_N_acetylmuramoyl_pentapeptide_biosynthesis_I_(meso_diaminopimelate_containing)	UBISYN_PWY__superpathway_of_ubiquinol_8_biosynthesis_(prokaryotic)	-0.130887
NONMEVIPP_PWY__methylerythritol_phosphate_pathway_I	UBISYN_PWY__superpathway_of_ubiquinol_8_biosynthesis_(prokaryotic)	-0.130696
PWY_6387__UDP_N_acetylmuramoyl_pentapeptide_biosynthesis_I_(meso_diaminopimelate_containing)	PWY_6708__ubiquinol_8_biosynthesis_(prokaryotic)	-0.130279
PWY_5855__ubiquinol_7_biosynthesis_(prokaryotic)	PWY_6387__UDP_N_acetylmuramoyl_pentapeptide_biosynthesis_I_(meso_diaminopimelate_containing)	-0.130279
PWY_5857__ubiquinol_10_biosynthesis_(prokaryotic)	PWY_6387__UDP_N_acetylmuramoyl_pentapeptide_biosynthesis_I_(meso_diaminopimelate_containing)	-0.130279
PWY_5856__ubiquinol_9_biosynthesis_(prokaryotic)	PWY_6387__UDP_N_acetylmuramoyl_pentapeptide_biosynthesis_I_(meso_diaminopimelate_containing)	-0.130279
PWY_6386__UDP_N_acetylmuramoyl_pentapeptide_biosynthesis_II_(lysine_containing)	UBISYN_PWY__superpathway_of_ubiquinol_8_biosynthesis_(prokaryotic)	-0.129948
PEPTIDOGLYCANSYN_PWY__peptidoglycan_biosynthesis_I_(meso_diaminopimelate_containing)	UBISYN_PWY__superpathway_of_ubiquinol_8_biosynthesis_(prokaryotic)	-0.129936
PEPTIDOGLYCANSYN_PWY__peptidoglycan_biosynthesis_I_(meso_diaminopimelate_containing)	PWY_6708__ubiquinol_8_biosynthesis_(prokaryotic)	-0.129598
PEPTIDOGLYCANSYN_PWY__peptidoglycan_biosynthesis_I_(meso_diaminopimelate_containing)	PWY_5857__ubiquinol_10_biosynthesis_(prokaryotic)	-0.129596
PEPTIDOGLYCANSYN_PWY__peptidoglycan_biosynthesis_I_(meso_diaminopimelate_containing)	PWY_5855__ubiquinol_7_biosynthesis_(prokaryotic)	-0.129595
PEPTIDOGLYCANSYN_PWY__peptidoglycan_biosynthesis_I_(meso_diaminopimelate_containing)	PWY_5856__ubiquinol_9_biosynthesis_(prokaryotic)	-0.129595
PWY_5855__ubiquinol_7_biosynthesis_(prokaryotic)	PWY_6386__UDP_N_acetylmuramoyl_pentapeptide_biosynthesis_II_(lysine_containing)	-0.129537
PWY_6386__UDP_N_acetylmuramoyl_pentapeptide_biosynthesis_II_(lysine_containing)	PWY_6708__ubiquinol_8_biosynthesis_(prokaryotic)	-0.129536
PWY_5856__ubiquinol_9_biosynthesis_(prokaryotic)	PWY_6386__UDP_N_acetylmuramoyl_pentapeptide_biosynthesis_II_(lysine_containing)	-0.129536
PWY_5857__ubiquinol_10_biosynthesis_(prokaryotic)	PWY_6386__UDP_N_acetylmuramoyl_pentapeptide_biosynthesis_II_(lysine_containing)	-0.129536
AST_PWY__L_arginine_degradation_II_(AST_pathway)	PWY_7221__guanosine_ribonucleotides_de_novo_biosynthesis	-0.128183
AST_PWY__L_arginine_degradation_II_(AST_pathway)	PWY_7219__adenosine_ribonucleotides_de_novo_biosynthesis	-0.127158
NONMEVIPP_PWY__methylerythritol_phosphate_pathway_I	PWY_6708__ubiquinol_8_biosynthesis_(prokaryotic)	-0.127157
NONMEVIPP_PWY__methylerythritol_phosphate_pathway_I	PWY_5857__ubiquinol_10_biosynthesis_(prokaryotic)	-0.127156
NONMEVIPP_PWY__methylerythritol_phosphate_pathway_I	PWY_5855__ubiquinol_7_biosynthesis_(prokaryotic)	-0.127154
NONMEVIPP_PWY__methylerythritol_phosphate_pathway_I	PWY_5856__ubiquinol_9_biosynthesis_(prokaryotic)	-0.127154
NONMEVIPP_PWY__methylerythritol_phosphate_pathway_I	PWY_7269__NAD/NADP_NADH/NADPH_mitochondrial_interconversion_(yeast)	-0.126432
AST_PWY__L_arginine_degradation_II_(AST_pathway)	PWY_5686__UMP_biosynthesis	-0.126343
AST_PWY__L_arginine_degradation_II_(AST_pathway)	PWY_5097__L_lysine_biosynthesis_VI	-0.1262
AST_PWY__L_arginine_degradation_II_(AST_pathway)	PWY_6737__starch_degradation_V	-0.125354
PWY_6387__UDP_N_acetylmuramoyl_pentapeptide_biosynthesis_I_(meso_diaminopimelate_containing)	TCA_GLYOX_BYPASS__superpathway_of_glyoxylate_bypass_and_TCA	-0.12383
GLYOXYLATE_BYPASS__glyoxylate_cycle	NONMEVIPP_PWY__methylerythritol_phosphate_pathway_I	-0.123416
AST_PWY__L_arginine_degradation_II_(AST_pathway)	TRNA_CHARGING_PWY__tRNA_charging	-0.123258
NONMEVIPP_PWY__methylerythritol_phosphate_pathway_I	TCA_GLYOX_BYPASS__superpathway_of_glyoxylate_bypass_and_TCA	-0.122941
PWY_5855__ubiquinol_7_biosynthesis_(prokaryotic)	PWY_7219__adenosine_ribonucleotides_de_novo_biosynthesis	-0.122897
PWY_5856__ubiquinol_9_biosynthesis_(prokaryotic)	PWY_7219__adenosine_ribonucleotides_de_novo_biosynthesis	-0.122897
PWY_5857__ubiquinol_10_biosynthesis_(prokaryotic)	PWY_7219__adenosine_ribonucleotides_de_novo_biosynthesis	-0.122897
PWY_6708__ubiquinol_8_biosynthesis_(prokaryotic)	PWY_7219__adenosine_ribonucleotides_de_novo_biosynthesis	-0.122896
PWY_7219__adenosine_ribonucleotides_de_novo_biosynthesis	UBISYN_PWY__superpathway_of_ubiquinol_8_biosynthesis_(prokaryotic)	-0.122736
PWY_6386__UDP_N_acetylmuramoyl_pentapeptide_biosynthesis_II_(lysine_containing)	TCA_GLYOX_BYPASS__superpathway_of_glyoxylate_bypass_and_TCA	-0.122668
PEPTIDOGLYCANSYN_PWY__peptidoglycan_biosynthesis_I_(meso_diaminopimelate_containing)	TCA_GLYOX_BYPASS__superpathway_of_glyoxylate_bypass_and_TCA	-0.122494
GLYOXYLATE_BYPASS__glyoxylate_cycle	PWY_6387__UDP_N_acetylmuramoyl_pentapeptide_biosynthesis_I_(meso_diaminopimelate_containing)	-0.122304
PWY_6387__UDP_N_acetylmuramoyl_pentapeptide_biosynthesis_I_(meso_diaminopimelate_containing)	PWY_7269__NAD/NADP_NADH/NADPH_mitochondrial_interconversion_(yeast)	-0.122273
PWY_5686__UMP_biosynthesis	UBISYN_PWY__superpathway_of_ubiquinol_8_biosynthesis_(prokaryotic)	-0.122182
GLYOXYLATE_BYPASS__glyoxylate_cycle	PEPTIDOGLYCANSYN_PWY__peptidoglycan_biosynthesis_I_(meso_diaminopimelate_containing)	-0.121761
PWY_5855__ubiquinol_7_biosynthesis_(prokaryotic)	PWY_7221__guanosine_ribonucleotides_de_novo_biosynthesis	-0.121722
PWY_6708__ubiquinol_8_biosynthesis_(prokaryotic)	PWY_7221__guanosine_ribonucleotides_de_novo_biosynthesis	-0.121722
PWY_5856__ubiquinol_9_biosynthesis_(prokaryotic)	PWY_7221__guanosine_ribonucleotides_de_novo_biosynthesis	-0.121721
PWY_5857__ubiquinol_10_biosynthesis_(prokaryotic)	PWY_7221__guanosine_ribonucleotides_de_novo_biosynthesis	-0.121721
GLYOXYLATE_BYPASS__glyoxylate_cycle	PWY_6386__UDP_N_acetylmuramoyl_pentapeptide_biosynthesis_II_(lysine_containing)	-0.121506
AST_PWY__L_arginine_degradation_II_(AST_pathway)	PWY_6163__chorismate_biosynthesis_from_3_dehydroquinate	-0.1215
PWY_7221__guanosine_ribonucleotides_de_novo_biosynthesis	UBISYN_PWY__superpathway_of_ubiquinol_8_biosynthesis_(prokaryotic)	-0.121252
PWY_5686__UMP_biosynthesis	PWY_6708__ubiquinol_8_biosynthesis_(prokaryotic)	-0.120982
PWY_5686__UMP_biosynthesis	PWY_5857__ubiquinol_10_biosynthesis_(prokaryotic)	-0.120981
PWY_5686__UMP_biosynthesis	PWY_5856__ubiquinol_9_biosynthesis_(prokaryotic)	-0.120979
PWY_5686__UMP_biosynthesis	PWY_5855__ubiquinol_7_biosynthesis_(prokaryotic)	-0.120978
PEPTIDOGLYCANSYN_PWY__peptidoglycan_biosynthesis_I_(meso_diaminopimelate_containing)	PWY_7269__NAD/NADP_NADH/NADPH_mitochondrial_interconversion_(yeast)	-0.120703
PWY_6386__UDP_N_acetylmuramoyl_pentapeptide_biosynthesis_II_(lysine_containing)	PWY_7269__NAD/NADP_NADH/NADPH_mitochondrial_interconversion_(yeast)	-0.120261
AST_PWY__L_arginine_degradation_II_(AST_pathway)	COMPLETE_ARO_PWY__superpathway_of_aromatic_amino_acid_biosynthesis	-0.119295
ARO_PWY__chorismate_biosynthesis_I	AST_PWY__L_arginine_degradation_II_(AST_pathway)	-0.119284
AST_PWY__L_arginine_degradation_II_(AST_pathway)	PWY_2942__L_lysine_biosynthesis_III	-0.119066
PWY_5097__L_lysine_biosynthesis_VI	UBISYN_PWY__superpathway_of_ubiquinol_8_biosynthesis_(prokaryotic)	-0.118814
NONMEVIPP_PWY__methylerythritol_phosphate_pathway_I	PWY_4041__&gamma;_glutamyl_cycle	-0.118274
PWY_5097__L_lysine_biosynthesis_VI	PWY_6708__ubiquinol_8_biosynthesis_(prokaryotic)	-0.117739
PWY_5097__L_lysine_biosynthesis_VI	PWY_5857__ubiquinol_10_biosynthesis_(prokaryotic)	-0.117738
PWY_5097__L_lysine_biosynthesis_VI	PWY_5856__ubiquinol_9_biosynthesis_(prokaryotic)	-0.117736
PWY_5097__L_lysine_biosynthesis_VI	PWY_5855__ubiquinol_7_biosynthesis_(prokaryotic)	-0.117736
HCAMHPDEG_PWY__3_phenylpropanoate_and_3_(3_hydroxyphenyl)propanoate_degradation_to_2_oxopent_4_enoate	NONMEVIPP_PWY__methylerythritol_phosphate_pathway_I	-0.117336
NONMEVIPP_PWY__methylerythritol_phosphate_pathway_I	PWY_6690__cinnamate_and_3_hydroxycinnamate_degradation_to_2_oxopent_4_enoate	-0.117334
NONMEVIPP_PWY__methylerythritol_phosphate_pathway_I	PWY_7254__TCA_cycle_VII_(acetate_producers)	-0.117141
PWY_7269__NAD/NADP_NADH/NADPH_mitochondrial_interconversion_(yeast)	TRNA_CHARGING_PWY__tRNA_charging	-0.117027
PWY_6163__chorismate_biosynthesis_from_3_dehydroquinate	PWY_6708__ubiquinol_8_biosynthesis_(prokaryotic)	-0.116952
PWY_5855__ubiquinol_7_biosynthesis_(prokaryotic)	PWY_6163__chorismate_biosynthesis_from_3_dehydroquinate	-0.116952
PWY_5857__ubiquinol_10_biosynthesis_(prokaryotic)	PWY_6163__chorismate_biosynthesis_from_3_dehydroquinate	-0.116952
PWY_5856__ubiquinol_9_biosynthesis_(prokaryotic)	PWY_6163__chorismate_biosynthesis_from_3_dehydroquinate	-0.116952
PWY_6387__UDP_N_acetylmuramoyl_pentapeptide_biosynthesis_I_(meso_diaminopimelate_containing)	PWY_7254__TCA_cycle_VII_(acetate_producers)	-0.116946
PEPTIDOGLYCANSYN_PWY__peptidoglycan_biosynthesis_I_(meso_diaminopimelate_containing)	PWY_7254__TCA_cycle_VII_(acetate_producers)	-0.116809
PWY_6386__UDP_N_acetylmuramoyl_pentapeptide_biosynthesis_II_(lysine_containing)	PWY_7254__TCA_cycle_VII_(acetate_producers)	-0.116702
GLYOXYLATE_BYPASS__glyoxylate_cycle	PWY_5686__UMP_biosynthesis	-0.116015
PWY_5686__UMP_biosynthesis	PWY_7269__NAD/NADP_NADH/NADPH_mitochondrial_interconversion_(yeast)	-0.115876
PWY_6163__chorismate_biosynthesis_from_3_dehydroquinate	UBISYN_PWY__superpathway_of_ubiquinol_8_biosynthesis_(prokaryotic)	-0.115786
PWY_5686__UMP_biosynthesis	TCA_GLYOX_BYPASS__superpathway_of_glyoxylate_bypass_and_TCA	-0.115441
PWY_6737__starch_degradation_V	UBISYN_PWY__superpathway_of_ubiquinol_8_biosynthesis_(prokaryotic)	-0.115197
COMPLETE_ARO_PWY__superpathway_of_aromatic_amino_acid_biosynthesis	UBISYN_PWY__superpathway_of_ubiquinol_8_biosynthesis_(prokaryotic)	-0.115154
PWY_7219__adenosine_ribonucleotides_de_novo_biosynthesis	TCA_GLYOX_BYPASS__superpathway_of_glyoxylate_bypass_and_TCA	-0.114969
PWY_7221__guanosine_ribonucleotides_de_novo_biosynthesis	TCA_GLYOX_BYPASS__superpathway_of_glyoxylate_bypass_and_TCA	-0.114616
PWY_6163__chorismate_biosynthesis_from_3_dehydroquinate	TCA_GLYOX_BYPASS__superpathway_of_glyoxylate_bypass_and_TCA	-0.114527
PWY_2942__L_lysine_biosynthesis_III	PWY_6708__ubiquinol_8_biosynthesis_(prokaryotic)	-0.114401
PWY_2942__L_lysine_biosynthesis_III	PWY_5857__ubiquinol_10_biosynthesis_(prokaryotic)	-0.1144
PWY_2942__L_lysine_biosynthesis_III	PWY_5855__ubiquinol_7_biosynthesis_(prokaryotic)	-0.114398
PWY_2942__L_lysine_biosynthesis_III	PWY_5856__ubiquinol_9_biosynthesis_(prokaryotic)	-0.114398
GLYOXYLATE_BYPASS__glyoxylate_cycle	PWY_7219__adenosine_ribonucleotides_de_novo_biosynthesis	-0.114347
GLYOXYLATE_BYPASS__glyoxylate_cycle	PWY_7221__guanosine_ribonucleotides_de_novo_biosynthesis	-0.114339
PWY_6387__UDP_N_acetylmuramoyl_pentapeptide_biosynthesis_I_(meso_diaminopimelate_containing)	PWY_6690__cinnamate_and_3_hydroxycinnamate_degradation_to_2_oxopent_4_enoate	-0.114275
HCAMHPDEG_PWY__3_phenylpropanoate_and_3_(3_hydroxyphenyl)propanoate_degradation_to_2_oxopent_4_enoate	PWY_6387__UDP_N_acetylmuramoyl_pentapeptide_biosynthesis_I_(meso_diaminopimelate_containing)	-0.114275
PWY_2942__L_lysine_biosynthesis_III	UBISYN_PWY__superpathway_of_ubiquinol_8_biosynthesis_(prokaryotic)	-0.114197
PWY_7221__guanosine_ribonucleotides_de_novo_biosynthesis	PWY_7269__NAD/NADP_NADH/NADPH_mitochondrial_interconversion_(yeast)	-0.114179
NONMEVIPP_PWY__methylerythritol_phosphate_pathway_I	POLYISOPRENSYN_PWY__polyisoprenoid_biosynthesis_(E._coli)	-0.113968
GLYOXYLATE_BYPASS__glyoxylate_cycle	PWY_5097__L_lysine_biosynthesis_VI	-0.113797
COMPLETE_ARO_PWY__superpathway_of_aromatic_amino_acid_biosynthesis	PWY_6708__ubiquinol_8_biosynthesis_(prokaryotic)	-0.113666
COMPLETE_ARO_PWY__superpathway_of_aromatic_amino_acid_biosynthesis	PWY_5857__ubiquinol_10_biosynthesis_(prokaryotic)	-0.113666
COMPLETE_ARO_PWY__superpathway_of_aromatic_amino_acid_biosynthesis	PWY_5855__ubiquinol_7_biosynthesis_(prokaryotic)	-0.113665
COMPLETE_ARO_PWY__superpathway_of_aromatic_amino_acid_biosynthesis	PWY_5856__ubiquinol_9_biosynthesis_(prokaryotic)	-0.113665
ARO_PWY__chorismate_biosynthesis_I	UBISYN_PWY__superpathway_of_ubiquinol_8_biosynthesis_(prokaryotic)	-0.113578
PEPTIDOGLYCANSYN_PWY__peptidoglycan_biosynthesis_I_(meso_diaminopimelate_containing)	PWY_6690__cinnamate_and_3_hydroxycinnamate_degradation_to_2_oxopent_4_enoate	-0.113311
HCAMHPDEG_PWY__3_phenylpropanoate_and_3_(3_hydroxyphenyl)propanoate_degradation_to_2_oxopent_4_enoate	PEPTIDOGLYCANSYN_PWY__peptidoglycan_biosynthesis_I_(meso_diaminopimelate_containing)	-0.113308
PWY_6386__UDP_N_acetylmuramoyl_pentapeptide_biosynthesis_II_(lysine_containing)	PWY_6690__cinnamate_and_3_hydroxycinnamate_degradation_to_2_oxopent_4_enoate	-0.113035
HCAMHPDEG_PWY__3_phenylpropanoate_and_3_(3_hydroxyphenyl)propanoate_degradation_to_2_oxopent_4_enoate	PWY_6386__UDP_N_acetylmuramoyl_pentapeptide_biosynthesis_II_(lysine_containing)	-0.113034
TRNA_CHARGING_PWY__tRNA_charging	UBISYN_PWY__superpathway_of_ubiquinol_8_biosynthesis_(prokaryotic)	-0.112977
PWY_7219__adenosine_ribonucleotides_de_novo_biosynthesis	PWY_7254__TCA_cycle_VII_(acetate_producers)	-0.112362
KDO_NAGLIPASYN_PWY__superpathway_of_(Kdo)2_lipid_A_biosynthesis	NONMEVIPP_PWY__methylerythritol_phosphate_pathway_I	-0.112239
POLYISOPRENSYN_PWY__polyisoprenoid_biosynthesis_(E._coli)	PWY_6737__starch_degradation_V	-0.112126
PWY_5097__L_lysine_biosynthesis_VI	PWY_7254__TCA_cycle_VII_(acetate_producers)	-0.112075
PWY_7219__adenosine_ribonucleotides_de_novo_biosynthesis	PWY_7269__NAD/NADP_NADH/NADPH_mitochondrial_interconversion_(yeast)	-0.112046
PWY_5097__L_lysine_biosynthesis_VI	TCA_GLYOX_BYPASS__superpathway_of_glyoxylate_bypass_and_TCA	-0.111669
PWY_5097__L_lysine_biosynthesis_VI	PWY_7269__NAD/NADP_NADH/NADPH_mitochondrial_interconversion_(yeast)	-0.111556
ARO_PWY__chorismate_biosynthesis_I	PWY_5857__ubiquinol_10_biosynthesis_(prokaryotic)	-0.111464
ARO_PWY__chorismate_biosynthesis_I	PWY_6708__ubiquinol_8_biosynthesis_(prokaryotic)	-0.111464
ARO_PWY__chorismate_biosynthesis_I	PWY_5856__ubiquinol_9_biosynthesis_(prokaryotic)	-0.111461
NONMEVIPP_PWY__methylerythritol_phosphate_pathway_I	PWY0_1277__3_phenylpropanoate_and_3_(3_hydroxyphenyl)propanoate_degradation	-0.111114
PWY_6387__UDP_N_acetylmuramoyl_pentapeptide_biosynthesis_I_(meso_diaminopimelate_containing)	PWY_6803__phosphatidylcholine_acyl_editing	-0.111016
PWY_5855__ubiquinol_7_biosynthesis_(prokaryotic)	PWY_724__superpathway_of_L_lysine,_L_threonine_and_L_methionine_biosynthesis_II	-0.110805
PWY_5856__ubiquinol_9_biosynthesis_(prokaryotic)	PWY_724__superpathway_of_L_lysine,_L_threonine_and_L_methionine_biosynthesis_II	-0.110804
PWY_5857__ubiquinol_10_biosynthesis_(prokaryotic)	PWY_724__superpathway_of_L_lysine,_L_threonine_and_L_methionine_biosynthesis_II	-0.110804
PWY_6708__ubiquinol_8_biosynthesis_(prokaryotic)	PWY_724__superpathway_of_L_lysine,_L_threonine_and_L_methionine_biosynthesis_II	-0.110803
GLYOXYLATE_BYPASS__glyoxylate_cycle	PWY_2942__L_lysine_biosynthesis_III	-0.11061
PWY_6737__starch_degradation_V	PWY_7269__NAD/NADP_NADH/NADPH_mitochondrial_interconversion_(yeast)	-0.110276
PWY_6737__starch_degradation_V	TCA_GLYOX_BYPASS__superpathway_of_glyoxylate_bypass_and_TCA	-0.110265
PWY_7221__guanosine_ribonucleotides_de_novo_biosynthesis	PWY_7254__TCA_cycle_VII_(acetate_producers)	-0.110254
PWY_724__superpathway_of_L_lysine,_L_threonine_and_L_methionine_biosynthesis_II	UBISYN_PWY__superpathway_of_ubiquinol_8_biosynthesis_(prokaryotic)	-0.110236
PWY_6386__UDP_N_acetylmuramoyl_pentapeptide_biosynthesis_II_(lysine_containing)	PWY_6803__phosphatidylcholine_acyl_editing	-0.109394
PWY_6163__chorismate_biosynthesis_from_3_dehydroquinate	PWY_7269__NAD/NADP_NADH/NADPH_mitochondrial_interconversion_(yeast)	-0.109297
PWY_6708__ubiquinol_8_biosynthesis_(prokaryotic)	PWY_6737__starch_degradation_V	-0.109016
PWY_5857__ubiquinol_10_biosynthesis_(prokaryotic)	PWY_6737__starch_degradation_V	-0.109016
PWY_5855__ubiquinol_7_biosynthesis_(prokaryotic)	PWY_6737__starch_degradation_V	-0.109015
PWY_5856__ubiquinol_9_biosynthesis_(prokaryotic)	PWY_6737__starch_degradation_V	-0.109015
GLYCOLYSIS_TCA_GLYOX_BYPASS__superpathway_of_glycolysis,_pyruvate_dehydrogenase,_TCA,_and_glyoxylate_bypass	PWY_6387__UDP_N_acetylmuramoyl_pentapeptide_biosynthesis_I_(meso_diaminopimelate_containing)	-0.108995
PWY_5686__UMP_biosynthesis	PWY_7254__TCA_cycle_VII_(acetate_producers)	-0.108951
NAD_BIOSYNTHESIS_II__NAD_salvage_pathway_II	NONMEVIPP_PWY__methylerythritol_phosphate_pathway_I	-0.108816
PEPTIDOGLYCANSYN_PWY__peptidoglycan_biosynthesis_I_(meso_diaminopimelate_containing)	PWY_6803__phosphatidylcholine_acyl_editing	-0.10878
COMPLETE_ARO_PWY__superpathway_of_aromatic_amino_acid_biosynthesis	TCA_GLYOX_BYPASS__superpathway_of_glyoxylate_bypass_and_TCA	-0.108673
ARO_PWY__chorismate_biosynthesis_I	TCA_GLYOX_BYPASS__superpathway_of_glyoxylate_bypass_and_TCA	-0.108481
GLUCOSE1PMETAB_PWY__glucose_and_glucose_1_phosphate_degradation	NONMEVIPP_PWY__methylerythritol_phosphate_pathway_I	-0.108378
AST_PWY__L_arginine_degradation_II_(AST_pathway)	PWY_724__superpathway_of_L_lysine,_L_threonine_and_L_methionine_biosynthesis_II	-0.107748
ARO_PWY__chorismate_biosynthesis_I	PWY_7269__NAD/NADP_NADH/NADPH_mitochondrial_interconversion_(yeast)	-0.107592
PWY_2942__L_lysine_biosynthesis_III	PWY_7254__TCA_cycle_VII_(acetate_producers)	-0.107569
COMPLETE_ARO_PWY__superpathway_of_aromatic_amino_acid_biosynthesis	PWY_7269__NAD/NADP_NADH/NADPH_mitochondrial_interconversion_(yeast)	-0.107453
PWY_4041__&gamma;_glutamyl_cycle	PWY_6387__UDP_N_acetylmuramoyl_pentapeptide_biosynthesis_I_(meso_diaminopimelate_containing)	-0.107432
GLYCOLYSIS_TCA_GLYOX_BYPASS__superpathway_of_glycolysis,_pyruvate_dehydrogenase,_TCA,_and_glyoxylate_bypass	PEPTIDOGLYCANSYN_PWY__peptidoglycan_biosynthesis_I_(meso_diaminopimelate_containing)	-0.107379
GLYCOLYSIS_TCA_GLYOX_BYPASS__superpathway_of_glycolysis,_pyruvate_dehydrogenase,_TCA,_and_glyoxylate_bypass	PWY_6386__UDP_N_acetylmuramoyl_pentapeptide_biosynthesis_II_(lysine_containing)	-0.107349
PWY_2942__L_lysine_biosynthesis_III	TCA_GLYOX_BYPASS__superpathway_of_glyoxylate_bypass_and_TCA	-0.107099
GLYOXYLATE_BYPASS__glyoxylate_cycle	PWY_6163__chorismate_biosynthesis_from_3_dehydroquinate	-0.107071
GLYCOLYSIS_TCA_GLYOX_BYPASS__superpathway_of_glycolysis,_pyruvate_dehydrogenase,_TCA,_and_glyoxylate_bypass	NONMEVIPP_PWY__methylerythritol_phosphate_pathway_I	-0.106945
PWY0_1277__3_phenylpropanoate_and_3_(3_hydroxyphenyl)propanoate_degradation	PWY_6387__UDP_N_acetylmuramoyl_pentapeptide_biosynthesis_I_(meso_diaminopimelate_containing)	-0.106775
PEPTIDOGLYCANSYN_PWY__peptidoglycan_biosynthesis_I_(meso_diaminopimelate_containing)	PWY0_1277__3_phenylpropanoate_and_3_(3_hydroxyphenyl)propanoate_degradation	-0.106593
PWY_5855__ubiquinol_7_biosynthesis_(prokaryotic)	TRNA_CHARGING_PWY__tRNA_charging	-0.106243
PWY_6708__ubiquinol_8_biosynthesis_(prokaryotic)	TRNA_CHARGING_PWY__tRNA_charging	-0.106243
PWY_5857__ubiquinol_10_biosynthesis_(prokaryotic)	TRNA_CHARGING_PWY__tRNA_charging	-0.106243
PWY_5856__ubiquinol_9_biosynthesis_(prokaryotic)	TRNA_CHARGING_PWY__tRNA_charging	-0.106243
GLUCOSE1PMETAB_PWY__glucose_and_glucose_1_phosphate_degradation	TRNA_CHARGING_PWY__tRNA_charging	-0.106216
HCAMHPDEG_PWY__3_phenylpropanoate_and_3_(3_hydroxyphenyl)propanoate_degradation_to_2_oxopent_4_enoate	TRNA_CHARGING_PWY__tRNA_charging	-0.106172
PWY_6690__cinnamate_and_3_hydroxycinnamate_degradation_to_2_oxopent_4_enoate	TRNA_CHARGING_PWY__tRNA_charging	-0.10617
PWY0_1277__3_phenylpropanoate_and_3_(3_hydroxyphenyl)propanoate_degradation	PWY_6386__UDP_N_acetylmuramoyl_pentapeptide_biosynthesis_II_(lysine_containing)	-0.106123
PWY_4041__&gamma;_glutamyl_cycle	PWY_6386__UDP_N_acetylmuramoyl_pentapeptide_biosynthesis_II_(lysine_containing)	-0.105992
HCAMHPDEG_PWY__3_phenylpropanoate_and_3_(3_hydroxyphenyl)propanoate_degradation_to_2_oxopent_4_enoate	PWY_7221__guanosine_ribonucleotides_de_novo_biosynthesis	-0.105882
PWY_6690__cinnamate_and_3_hydroxycinnamate_degradation_to_2_oxopent_4_enoate	PWY_7221__guanosine_ribonucleotides_de_novo_biosynthesis	-0.105882
PWY_5097__L_lysine_biosynthesis_VI	PWY_6690__cinnamate_and_3_hydroxycinnamate_degradation_to_2_oxopent_4_enoate	-0.105719
HCAMHPDEG_PWY__3_phenylpropanoate_and_3_(3_hydroxyphenyl)propanoate_degradation_to_2_oxopent_4_enoate	PWY_5097__L_lysine_biosynthesis_VI	-0.105718
GLYOXYLATE_BYPASS__glyoxylate_cycle	PWY_6737__starch_degradation_V	-0.105634
PEPTIDOGLYCANSYN_PWY__peptidoglycan_biosynthesis_I_(meso_diaminopimelate_containing)	PWY_4041__&gamma;_glutamyl_cycle	-0.105487
PWY_2942__L_lysine_biosynthesis_III	PWY_7269__NAD/NADP_NADH/NADPH_mitochondrial_interconversion_(yeast)	-0.104968
PWY_5686__UMP_biosynthesis	PWY_6690__cinnamate_and_3_hydroxycinnamate_degradation_to_2_oxopent_4_enoate	-0.104746
HCAMHPDEG_PWY__3_phenylpropanoate_and_3_(3_hydroxyphenyl)propanoate_degradation_to_2_oxopent_4_enoate	PWY_5686__UMP_biosynthesis	-0.104744
PWY_6163__chorismate_biosynthesis_from_3_dehydroquinate	PWY_7254__TCA_cycle_VII_(acetate_producers)	-0.10461
PWY_5083__NAD/NADH_phosphorylation_and_dephosphorylation	PWY_6387__UDP_N_acetylmuramoyl_pentapeptide_biosynthesis_I_(meso_diaminopimelate_containing)	-0.104342
TCA_GLYOX_BYPASS__superpathway_of_glyoxylate_bypass_and_TCA	TRNA_CHARGING_PWY__tRNA_charging	-0.104291
PWY_6690__cinnamate_and_3_hydroxycinnamate_degradation_to_2_oxopent_4_enoate	PWY_7219__adenosine_ribonucleotides_de_novo_biosynthesis	-0.103664
HCAMHPDEG_PWY__3_phenylpropanoate_and_3_(3_hydroxyphenyl)propanoate_degradation_to_2_oxopent_4_enoate	PWY_7219__adenosine_ribonucleotides_de_novo_biosynthesis	-0.103663
AST_PWY__L_arginine_degradation_II_(AST_pathway)	PWY_6700__queuosine_biosynthesis	-0.103655
PWY_724__superpathway_of_L_lysine,_L_threonine_and_L_methionine_biosynthesis_II	TCA_GLYOX_BYPASS__superpathway_of_glyoxylate_bypass_and_TCA	-0.103572
GLYOXYLATE_BYPASS__glyoxylate_cycle	PWY_724__superpathway_of_L_lysine,_L_threonine_and_L_methionine_biosynthesis_II	-0.103471
AST_PWY__L_arginine_degradation_II_(AST_pathway)	PWY_6151__S_adenosyl_L_methionine_cycle_I	-0.103354
PWY_6737__starch_degradation_V	PWY_6803__phosphatidylcholine_acyl_editing	-0.10313
PWY_6737__starch_degradation_V	PWY_7254__TCA_cycle_VII_(acetate_producers)	-0.102965
PWY0_1241__ADP_L_glycero_&beta;_D_manno_heptose_biosynthesis	PWY_6737__starch_degradation_V	-0.10274
GLYOXYLATE_BYPASS__glyoxylate_cycle	TRNA_CHARGING_PWY__tRNA_charging	-0.102739
NONMEVIPP_PWY__methylerythritol_phosphate_pathway_I	PWY_6823__molybdenum_cofactor_biosynthesis	-0.10271
PEPTIDOGLYCANSYN_PWY__peptidoglycan_biosynthesis_I_(meso_diaminopimelate_containing)	PWY_5083__NAD/NADH_phosphorylation_and_dephosphorylation	-0.102557
PWY_6803__phosphatidylcholine_acyl_editing	PWY_7219__adenosine_ribonucleotides_de_novo_biosynthesis	-0.102403
GLYCOLYSIS_TCA_GLYOX_BYPASS__superpathway_of_glycolysis,_pyruvate_dehydrogenase,_TCA,_and_glyoxylate_bypass	PWY_6163__chorismate_biosynthesis_from_3_dehydroquinate	-0.102123
COA_PWY_1__coenzyme_A_biosynthesis_II_(mammalian)	PWY_5857__ubiquinol_10_biosynthesis_(prokaryotic)	-0.10199
COA_PWY_1__coenzyme_A_biosynthesis_II_(mammalian)	PWY_6708__ubiquinol_8_biosynthesis_(prokaryotic)	-0.10199
COA_PWY_1__coenzyme_A_biosynthesis_II_(mammalian)	PWY_5855__ubiquinol_7_biosynthesis_(prokaryotic)	-0.101989
COA_PWY_1__coenzyme_A_biosynthesis_II_(mammalian)	PWY_5856__ubiquinol_9_biosynthesis_(prokaryotic)	-0.101988
AST_PWY__L_arginine_degradation_II_(AST_pathway)	PWY0_1319__CDP_diacylglycerol_biosynthesis_II	-0.101821
PWY_2942__L_lysine_biosynthesis_III	PWY_6690__cinnamate_and_3_hydroxycinnamate_degradation_to_2_oxopent_4_enoate	-0.101701
HCAMHPDEG_PWY__3_phenylpropanoate_and_3_(3_hydroxyphenyl)propanoate_degradation_to_2_oxopent_4_enoate	PWY_2942__L_lysine_biosynthesis_III	-0.1017
PWY_5083__NAD/NADH_phosphorylation_and_dephosphorylation	PWY_6386__UDP_N_acetylmuramoyl_pentapeptide_biosynthesis_II_(lysine_containing)	-0.101683
PWY_6163__chorismate_biosynthesis_from_3_dehydroquinate	PWY_6803__phosphatidylcholine_acyl_editing	-0.101406
PWY0_1277__3_phenylpropanoate_and_3_(3_hydroxyphenyl)propanoate_degradation	PWY_7221__guanosine_ribonucleotides_de_novo_biosynthesis	-0.101394
PWY0_1277__3_phenylpropanoate_and_3_(3_hydroxyphenyl)propanoate_degradation	PWY_5097__L_lysine_biosynthesis_VI	-0.101186
KDO_NAGLIPASYN_PWY__superpathway_of_(Kdo)2_lipid_A_biosynthesis	PWY_6387__UDP_N_acetylmuramoyl_pentapeptide_biosynthesis_I_(meso_diaminopimelate_containing)	-0.100835
KDO_NAGLIPASYN_PWY__superpathway_of_(Kdo)2_lipid_A_biosynthesis	PWY_6386__UDP_N_acetylmuramoyl_pentapeptide_biosynthesis_II_(lysine_containing)	-0.1004
COMPLETE_ARO_PWY__superpathway_of_aromatic_amino_acid_biosynthesis	PWY_7254__TCA_cycle_VII_(acetate_producers)	-0.100373
PWY0_1241__ADP_L_glycero_&beta;_D_manno_heptose_biosynthesis	PWY_6387__UDP_N_acetylmuramoyl_pentapeptide_biosynthesis_I_(meso_diaminopimelate_containing)	-0.100333
PWY_4041__&gamma;_glutamyl_cycle	PWY_5686__UMP_biosynthesis	-0.100124
AST_PWY__L_arginine_degradation_II_(AST_pathway)	PWY_5667__CDP_diacylglycerol_biosynthesis_I	-0.100059
PWY_724__superpathway_of_L_lysine,_L_threonine_and_L_methionine_biosynthesis_II	PWY_7269__NAD/NADP_NADH/NADPH_mitochondrial_interconversion_(yeast)	-0.100014
NAD_BIOSYNTHESIS_II__NAD_salvage_pathway_II	PWY_6737__starch_degradation_V	-0.0999207
PWY0_1277__3_phenylpropanoate_and_3_(3_hydroxyphenyl)propanoate_degradation	PWY_5686__UMP_biosynthesis	-0.0997429
GLYCOLYSIS_TCA_GLYOX_BYPASS__superpathway_of_glycolysis,_pyruvate_dehydrogenase,_TCA,_and_glyoxylate_bypass	PWY_5686__UMP_biosynthesis	-0.0996492
PWY_6803__phosphatidylcholine_acyl_editing	PWY_7221__guanosine_ribonucleotides_de_novo_biosynthesis	-0.099614
KDO_NAGLIPASYN_PWY__superpathway_of_(Kdo)2_lipid_A_biosynthesis	TRNA_CHARGING_PWY__tRNA_charging	-0.0994312
GLYCOLYSIS_TCA_GLYOX_BYPASS__superpathway_of_glycolysis,_pyruvate_dehydrogenase,_TCA,_and_glyoxylate_bypass	PWY_7219__adenosine_ribonucleotides_de_novo_biosynthesis	-0.0993614
PWY0_1241__ADP_L_glycero_&beta;_D_manno_heptose_biosynthesis	PWY_5686__UMP_biosynthesis	-0.0993356
PWY_5083__NAD/NADH_phosphorylation_and_dephosphorylation	TRNA_CHARGING_PWY__tRNA_charging	-0.0993013
PWY0_1277__3_phenylpropanoate_and_3_(3_hydroxyphenyl)propanoate_degradation	PWY_7219__adenosine_ribonucleotides_de_novo_biosynthesis	-0.0990378
COA_PWY_1__coenzyme_A_biosynthesis_II_(mammalian)	UBISYN_PWY__superpathway_of_ubiquinol_8_biosynthesis_(prokaryotic)	-0.0990326
KDO_NAGLIPASYN_PWY__superpathway_of_(Kdo)2_lipid_A_biosynthesis	PEPTIDOGLYCANSYN_PWY__peptidoglycan_biosynthesis_I_(meso_diaminopimelate_containing)	-0.0990221
PWY0_1241__ADP_L_glycero_&beta;_D_manno_heptose_biosynthesis	PWY_6386__UDP_N_acetylmuramoyl_pentapeptide_biosynthesis_II_(lysine_containing)	-0.0989066
PWY_5083__NAD/NADH_phosphorylation_and_dephosphorylation	PWY_6737__starch_degradation_V	-0.0987906
POLYISOPRENSYN_PWY__polyisoprenoid_biosynthesis_(E._coli)	PWY_5686__UMP_biosynthesis	-0.098654
ARO_PWY__chorismate_biosynthesis_I	PWY_7254__TCA_cycle_VII_(acetate_producers)	-0.0986266
PWY_4041__&gamma;_glutamyl_cycle	PWY_5097__L_lysine_biosynthesis_VI	-0.0985919
PWY_5083__NAD/NADH_phosphorylation_and_dephosphorylation	PWY_5686__UMP_biosynthesis	-0.0985701
PWY_6803__phosphatidylcholine_acyl_editing	PWY_724__superpathway_of_L_lysine,_L_threonine_and_L_methionine_biosynthesis_II	-0.0985606
COMPLETE_ARO_PWY__superpathway_of_aromatic_amino_acid_biosynthesis	PWY_6803__phosphatidylcholine_acyl_editing	-0.0983517
KDO_NAGLIPASYN_PWY__superpathway_of_(Kdo)2_lipid_A_biosynthesis	PWY_6737__starch_degradation_V	-0.0983294
GLYCOLYSIS_TCA_GLYOX_BYPASS__superpathway_of_glycolysis,_pyruvate_dehydrogenase,_TCA,_and_glyoxylate_bypass	PWY_7221__guanosine_ribonucleotides_de_novo_biosynthesis	-0.0983215
PWY_4041__&gamma;_glutamyl_cycle	PWY_7221__guanosine_ribonucleotides_de_novo_biosynthesis	-0.0981519
PWY_6690__cinnamate_and_3_hydroxycinnamate_degradation_to_2_oxopent_4_enoate	PWY_6737__starch_degradation_V	-0.0981126
HCAMHPDEG_PWY__3_phenylpropanoate_and_3_(3_hydroxyphenyl)propanoate_degradation_to_2_oxopent_4_enoate	PWY_6737__starch_degradation_V	-0.0981121
NAD_BIOSYNTHESIS_II__NAD_salvage_pathway_II	PWY_6387__UDP_N_acetylmuramoyl_pentapeptide_biosynthesis_I_(meso_diaminopimelate_containing)	-0.0980813
ARO_PWY__chorismate_biosynthesis_I	PWY_6803__phosphatidylcholine_acyl_editing	-0.097989
PWY0_1277__3_phenylpropanoate_and_3_(3_hydroxyphenyl)propanoate_degradation	PWY_2942__L_lysine_biosynthesis_III	-0.0979699
KDO_NAGLIPASYN_PWY__superpathway_of_(Kdo)2_lipid_A_biosynthesis	PWY_5686__UMP_biosynthesis	-0.0979344
PWY_6151__S_adenosyl_L_methionine_cycle_I	UBISYN_PWY__superpathway_of_ubiquinol_8_biosynthesis_(prokaryotic)	-0.0978738
NAD_BIOSYNTHESIS_II__NAD_salvage_pathway_II	PEPTIDOGLYCANSYN_PWY__peptidoglycan_biosynthesis_I_(meso_diaminopimelate_containing)	-0.0978592
PWY0_1319__CDP_diacylglycerol_biosynthesis_II	UBISYN_PWY__superpathway_of_ubiquinol_8_biosynthesis_(prokaryotic)	-0.0977346
GLUCOSE1PMETAB_PWY__glucose_and_glucose_1_phosphate_degradation	PWY_6387__UDP_N_acetylmuramoyl_pentapeptide_biosynthesis_I_(meso_diaminopimelate_containing)	-0.0975922
POLYISOPRENSYN_PWY__polyisoprenoid_biosynthesis_(E._coli)	TRNA_CHARGING_PWY__tRNA_charging	-0.097568
NAD_BIOSYNTHESIS_II__NAD_salvage_pathway_II	PWY_5686__UMP_biosynthesis	-0.0974363
COMPLETE_ARO_PWY__superpathway_of_aromatic_amino_acid_biosynthesis	GLYCOLYSIS_TCA_GLYOX_BYPASS__superpathway_of_glycolysis,_pyruvate_dehydrogenase,_TCA,_and_glyoxylate_bypass	-0.0973821
POLYISOPRENSYN_PWY__polyisoprenoid_biosynthesis_(E._coli)	PWY_6387__UDP_N_acetylmuramoyl_pentapeptide_biosynthesis_I_(meso_diaminopimelate_containing)	-0.0971675
POLYISOPRENSYN_PWY__polyisoprenoid_biosynthesis_(E._coli)	PWY_6386__UDP_N_acetylmuramoyl_pentapeptide_biosynthesis_II_(lysine_containing)	-0.0965867
KDO_NAGLIPASYN_PWY__superpathway_of_(Kdo)2_lipid_A_biosynthesis	PWY_7221__guanosine_ribonucleotides_de_novo_biosynthesis	-0.0963924
NAD_BIOSYNTHESIS_II__NAD_salvage_pathway_II	PWY_6386__UDP_N_acetylmuramoyl_pentapeptide_biosynthesis_II_(lysine_containing)	-0.096314
GLUCOSE1PMETAB_PWY__glucose_and_glucose_1_phosphate_degradation	PEPTIDOGLYCANSYN_PWY__peptidoglycan_biosynthesis_I_(meso_diaminopimelate_containing)	-0.0962076
KDO_NAGLIPASYN_PWY__superpathway_of_(Kdo)2_lipid_A_biosynthesis	PWY_6163__chorismate_biosynthesis_from_3_dehydroquinate	-0.0959646
PWY0_1241__ADP_L_glycero_&beta;_D_manno_heptose_biosynthesis	TRNA_CHARGING_PWY__tRNA_charging	-0.095831
GLUCOSE1PMETAB_PWY__glucose_and_glucose_1_phosphate_degradation	PWY_6386__UDP_N_acetylmuramoyl_pentapeptide_biosynthesis_II_(lysine_containing)	-0.0956555
KDO_NAGLIPASYN_PWY__superpathway_of_(Kdo)2_lipid_A_biosynthesis	PWY_5097__L_lysine_biosynthesis_VI	-0.0956082
GLYCOLYSIS_TCA_GLYOX_BYPASS__superpathway_of_glycolysis,_pyruvate_dehydrogenase,_TCA,_and_glyoxylate_bypass	PWY_6737__starch_degradation_V	-0.0956064
PWY0_1319__CDP_diacylglycerol_biosynthesis_II	TCA_GLYOX_BYPASS__superpathway_of_glyoxylate_bypass_and_TCA	-0.0951825
GLUCOSE1PMETAB_PWY__glucose_and_glucose_1_phosphate_degradation	PWY_6737__starch_degradation_V	-0.0951486
PEPTIDOGLYCANSYN_PWY__peptidoglycan_biosynthesis_I_(meso_diaminopimelate_containing)	POLYISOPRENSYN_PWY__polyisoprenoid_biosynthesis_(E._coli)	-0.0951366
GLUCOSE1PMETAB_PWY__glucose_and_glucose_1_phosphate_degradation	PWY_5686__UMP_biosynthesis	-0.0947316
KDO_NAGLIPASYN_PWY__superpathway_of_(Kdo)2_lipid_A_biosynthesis	PWY_7219__adenosine_ribonucleotides_de_novo_biosynthesis	-0.0946427
PWY_724__superpathway_of_L_lysine,_L_threonine_and_L_methionine_biosynthesis_II	PWY_7254__TCA_cycle_VII_(acetate_producers)	-0.094315
PWY_6803__phosphatidylcholine_acyl_editing	TRNA_CHARGING_PWY__tRNA_charging	-0.0942833
COA_PWY_1__coenzyme_A_biosynthesis_II_(mammalian)	TCA_GLYOX_BYPASS__superpathway_of_glyoxylate_bypass_and_TCA	-0.0940268
PWY0_1277__3_phenylpropanoate_and_3_(3_hydroxyphenyl)propanoate_degradation	TRNA_CHARGING_PWY__tRNA_charging	-0.0939534
POLYISOPRENSYN_PWY__polyisoprenoid_biosynthesis_(E._coli)	PWY_6163__chorismate_biosynthesis_from_3_dehydroquinate	-0.0936675
PWY_5083__NAD/NADH_phosphorylation_and_dephosphorylation	PWY_6163__chorismate_biosynthesis_from_3_dehydroquinate	-0.0935209
PWY_5667__CDP_diacylglycerol_biosynthesis_I	TCA_GLYOX_BYPASS__superpathway_of_glyoxylate_bypass_and_TCA	-0.0933616
PWY_5083__NAD/NADH_phosphorylation_and_dephosphorylation	PWY_7219__adenosine_ribonucleotides_de_novo_biosynthesis	-0.0933391
PWY_6151__S_adenosyl_L_methionine_cycle_I	PWY_7269__NAD/NADP_NADH/NADPH_mitochondrial_interconversion_(yeast)	-0.0928855
PWY0_1319__CDP_diacylglycerol_biosynthesis_II	PWY_7269__NAD/NADP_NADH/NADPH_mitochondrial_interconversion_(yeast)	-0.0917656
PWY0_1241__ADP_L_glycero_&beta;_D_manno_heptose_biosynthesis	PWY_7219__adenosine_ribonucleotides_de_novo_biosynthesis	-0.0916473
PWY_6690__cinnamate_and_3_hydroxycinnamate_degradation_to_2_oxopent_4_enoate	PWY_6700__queuosine_biosynthesis	-0.0914318
HCAMHPDEG_PWY__3_phenylpropanoate_and_3_(3_hydroxyphenyl)propanoate_degradation_to_2_oxopent_4_enoate	PWY_6700__queuosine_biosynthesis	-0.0914309
PWY_6700__queuosine_biosynthesis	PWY_7269__NAD/NADP_NADH/NADPH_mitochondrial_interconversion_(yeast)	-0.091295
GLYCOLYSIS_TCA_GLYOX_BYPASS__superpathway_of_glycolysis,_pyruvate_dehydrogenase,_TCA,_and_glyoxylate_bypass	PWY_724__superpathway_of_L_lysine,_L_threonine_and_L_methionine_biosynthesis_II	-0.0911338
ARO_PWY__chorismate_biosynthesis_I	POLYISOPRENSYN_PWY__polyisoprenoid_biosynthesis_(E._coli)	-0.091105
PWY_5083__NAD/NADH_phosphorylation_and_dephosphorylation	PWY_724__superpathway_of_L_lysine,_L_threonine_and_L_methionine_biosynthesis_II	-0.0908684
NAD_BIOSYNTHESIS_II__NAD_salvage_pathway_II	PWY_5097__L_lysine_biosynthesis_VI	-0.090863
GLYOXYLATE_BYPASS__glyoxylate_cycle	PWY_6700__queuosine_biosynthesis	-0.0907922
COMPLETE_ARO_PWY__superpathway_of_aromatic_amino_acid_biosynthesis	PWY_5083__NAD/NADH_phosphorylation_and_dephosphorylation	-0.0906585
PWY0_1277__3_phenylpropanoate_and_3_(3_hydroxyphenyl)propanoate_degradation	PWY_6700__queuosine_biosynthesis	-0.0905646
PWY_6387__UDP_N_acetylmuramoyl_pentapeptide_biosynthesis_I_(meso_diaminopimelate_containing)	PWY_6823__molybdenum_cofactor_biosynthesis	-0.0905017
ARO_PWY__chorismate_biosynthesis_I	PWY_5083__NAD/NADH_phosphorylation_and_dephosphorylation	-0.0904846
GLUCOSE1PMETAB_PWY__glucose_and_glucose_1_phosphate_degradation	PWY_5097__L_lysine_biosynthesis_VI	-0.0904465
PWY0_1241__ADP_L_glycero_&beta;_D_manno_heptose_biosynthesis	PWY_6163__chorismate_biosynthesis_from_3_dehydroquinate	-0.0904097
PWY_6386__UDP_N_acetylmuramoyl_pentapeptide_biosynthesis_II_(lysine_containing)	PWY_6823__molybdenum_cofactor_biosynthesis	-0.0903715
COMPLETE_ARO_PWY__superpathway_of_aromatic_amino_acid_biosynthesis	KDO_NAGLIPASYN_PWY__superpathway_of_(Kdo)2_lipid_A_biosynthesis	-0.0903085
PWY_4041__&gamma;_glutamyl_cycle	PWY_6700__queuosine_biosynthesis	-0.0901893
COMPLETE_ARO_PWY__superpathway_of_aromatic_amino_acid_biosynthesis	POLYISOPRENSYN_PWY__polyisoprenoid_biosynthesis_(E._coli)	-0.0899856
POLYISOPRENSYN_PWY__polyisoprenoid_biosynthesis_(E._coli)	PWY_5097__L_lysine_biosynthesis_VI	-0.0897101
PWY_6737__starch_degradation_V	PWY_6823__molybdenum_cofactor_biosynthesis	-0.0895832
PEPTIDOGLYCANSYN_PWY__peptidoglycan_biosynthesis_I_(meso_diaminopimelate_containing)	PWY_6823__molybdenum_cofactor_biosynthesis	-0.0892292
GLYCOLYSIS_TCA_GLYOX_BYPASS__superpathway_of_glycolysis,_pyruvate_dehydrogenase,_TCA,_and_glyoxylate_bypass	TRNA_CHARGING_PWY__tRNA_charging	-0.0891044
COA_PWY_1__coenzyme_A_biosynthesis_II_(mammalian)	PWY_6803__phosphatidylcholine_acyl_editing	-0.0884708
PWY_5686__UMP_biosynthesis	PWY_6823__molybdenum_cofactor_biosynthesis	-0.0882845
GLUCOSE1PMETAB_PWY__glucose_and_glucose_1_phosphate_degradation	PWY_7221__guanosine_ribonucleotides_de_novo_biosynthesis	-0.0882187
POLYISOPRENSYN_PWY__polyisoprenoid_biosynthesis_(E._coli)	PWY_7219__adenosine_ribonucleotides_de_novo_biosynthesis	-0.0880595
KDO_NAGLIPASYN_PWY__superpathway_of_(Kdo)2_lipid_A_biosynthesis	PWY_2942__L_lysine_biosynthesis_III	-0.0879542
NAD_BIOSYNTHESIS_II__NAD_salvage_pathway_II	PWY_7219__adenosine_ribonucleotides_de_novo_biosynthesis	-0.0876077
PWY_5097__L_lysine_biosynthesis_VI	PWY_6823__molybdenum_cofactor_biosynthesis	-0.0875809
COA_PWY_1__coenzyme_A_biosynthesis_II_(mammalian)	PWY_7254__TCA_cycle_VII_(acetate_producers)	-0.0867245
PWY_6163__chorismate_biosynthesis_from_3_dehydroquinate	PWY_6823__molybdenum_cofactor_biosynthesis	-0.0865753
PWY0_1241__ADP_L_glycero_&beta;_D_manno_heptose_biosynthesis	PWY_7221__guanosine_ribonucleotides_de_novo_biosynthesis	-0.0862462
PWY_6823__molybdenum_cofactor_biosynthesis	PWY_7221__guanosine_ribonucleotides_de_novo_biosynthesis	-0.0861225
PWY0_1319__CDP_diacylglycerol_biosynthesis_II	PWY_6803__phosphatidylcholine_acyl_editing	-0.085725
NAD_BIOSYNTHESIS_II__NAD_salvage_pathway_II	TRNA_CHARGING_PWY__tRNA_charging	-0.0854372
PWY_6823__molybdenum_cofactor_biosynthesis	TRNA_CHARGING_PWY__tRNA_charging	-0.0846388
PWY0_1277__3_phenylpropanoate_and_3_(3_hydroxyphenyl)propanoate_degradation	PWY_6151__S_adenosyl_L_methionine_cycle_I	-0.0844583
POLYISOPRENSYN_PWY__polyisoprenoid_biosynthesis_(E._coli)	PWY0_1319__CDP_diacylglycerol_biosynthesis_II	-0.0842395
PWY_5667__CDP_diacylglycerol_biosynthesis_I	PWY_6803__phosphatidylcholine_acyl_editing	-0.0841743
POLYISOPRENSYN_PWY__polyisoprenoid_biosynthesis_(E._coli)	PWY_5667__CDP_diacylglycerol_biosynthesis_I	-0.0840414
NAD_BIOSYNTHESIS_II__NAD_salvage_pathway_II	PWY_7221__guanosine_ribonucleotides_de_novo_biosynthesis	-0.0839278
NAD_BIOSYNTHESIS_II__NAD_salvage_pathway_II	PWY_2942__L_lysine_biosynthesis_III	-0.083896
GLUCOSE1PMETAB_PWY__glucose_and_glucose_1_phosphate_degradation	PWY_2942__L_lysine_biosynthesis_III	-0.0838142
PWY_6823__molybdenum_cofactor_biosynthesis	PWY_7219__adenosine_ribonucleotides_de_novo_biosynthesis	-0.0833266
GLYCOLYSIS_TCA_GLYOX_BYPASS__superpathway_of_glycolysis,_pyruvate_dehydrogenase,_TCA,_and_glyoxylate_bypass	PWY0_1319__CDP_diacylglycerol_biosynthesis_II	-0.0832815
NAD_BIOSYNTHESIS_II__NAD_salvage_pathway_II	PWY0_1319__CDP_diacylglycerol_biosynthesis_II	-0.0824524
NAD_BIOSYNTHESIS_II__NAD_salvage_pathway_II	PWY_5667__CDP_diacylglycerol_biosynthesis_I	-0.0823267
ARO_PWY__chorismate_biosynthesis_I	PWY_6823__molybdenum_cofactor_biosynthesis	-0.0818673
POLYISOPRENSYN_PWY__polyisoprenoid_biosynthesis_(E._coli)	PWY_2942__L_lysine_biosynthesis_III	-0.0816449
GLYCOLYSIS_TCA_GLYOX_BYPASS__superpathway_of_glycolysis,_pyruvate_dehydrogenase,_TCA,_and_glyoxylate_bypass	PWY_5667__CDP_diacylglycerol_biosynthesis_I	-0.0814446
NAD_BIOSYNTHESIS_II__NAD_salvage_pathway_II	PWY_6163__chorismate_biosynthesis_from_3_dehydroquinate	-0.0813194
PWY0_1241__ADP_L_glycero_&beta;_D_manno_heptose_biosynthesis	PWY_724__superpathway_of_L_lysine,_L_threonine_and_L_methionine_biosynthesis_II	-0.0806907
COA_PWY_1__coenzyme_A_biosynthesis_II_(mammalian)	PWY_5083__NAD/NADH_phosphorylation_and_dephosphorylation	-0.0806736
COMPLETE_ARO_PWY__superpathway_of_aromatic_amino_acid_biosynthesis	PWY_6823__molybdenum_cofactor_biosynthesis	-0.0803124
PWY_2942__L_lysine_biosynthesis_III	PWY_6823__molybdenum_cofactor_biosynthesis	-0.0799917
GLUCOSE1PMETAB_PWY__glucose_and_glucose_1_phosphate_degradation	PWY_6700__queuosine_biosynthesis	-0.0777092
PWY0_1241__ADP_L_glycero_&beta;_D_manno_heptose_biosynthesis	PWY0_1319__CDP_diacylglycerol_biosynthesis_II	-0.0776517
PWY0_1241__ADP_L_glycero_&beta;_D_manno_heptose_biosynthesis	PWY_5667__CDP_diacylglycerol_biosynthesis_I	-0.0775361
KDO_NAGLIPASYN_PWY__superpathway_of_(Kdo)2_lipid_A_biosynthesis	PWY_6151__S_adenosyl_L_methionine_cycle_I	-0.0763291
PWY_6700__queuosine_biosynthesis	PWY_6823__molybdenum_cofactor_biosynthesis	-0.074565
POLYISOPRENSYN_PWY__polyisoprenoid_biosynthesis_(E._coli)	PWY_6700__queuosine_biosynthesis	-0.0743586
NAD_BIOSYNTHESIS_II__NAD_salvage_pathway_II	PWY_6700__queuosine_biosynthesis	-0.0713206
PWY_6151__S_adenosyl_L_methionine_cycle_I	PWY_6823__molybdenum_cofactor_biosynthesis	-0.0707979
GLYOXYLATE_BYPASS__glyoxylate_cycle	PWY_6545__pyrimidine_deoxyribonucleotides_de_novo_biosynthesis_III	-0.0492623
PWY_6545__pyrimidine_deoxyribonucleotides_de_novo_biosynthesis_III	TCA_GLYOX_BYPASS__superpathway_of_glyoxylate_bypass_and_TCA	-0.0482364
PWY0_1241__ADP_L_glycero_&beta;_D_manno_heptose_biosynthesis	PWY_6545__pyrimidine_deoxyribonucleotides_de_novo_biosynthesis_III	-0.0374663
GLUCOSE1PMETAB_PWY__glucose_and_glucose_1_phosphate_degradation	PWY_6545__pyrimidine_deoxyribonucleotides_de_novo_biosynthesis_III	-0.0370755
